# Supplementary material
Source: Research Square preprint supplement (doi:10.21203/rs.3.rs-9567697/v1)
Supplement: Supplementary file 1 [file afc71dc8457dc959a7a8f7df.docx]

# Supplementary Materials of

## Transfer Learning Across Material Properties Using Center-Environment Features: From Energetics to Mechanical Properties in Multi-Component Mo Alloys

Liqin Qina, Yuchao Tanga, Limin Zhanga, Bin Xiaoa, Wenyi Huoc, and Yi Liu*a,b

a Materials Genome Institute & State Key Laboratory of Materials for Advanced Nuclear Energy, Shanghai University, Shanghai 200444, China

b Institute of Low-dimensional Carbons and Device Physics, Shanghai University, Shanghai 200444, China

c NOMATEN Centre of Excellence, National Centre for Nuclear Research, Otwock 05-400, Poland

*Email: [yiliu@shu.edu.cn](mailto:yiliu@shu.edu.cn) (Y. L.)

**Text S1** Computational parameters in the first-principles calculations

In this work, the target properties, single- and double-site substitution energy (ESS and EDS), are defined as follows:

|  | (1) |
| --- | --- |
|  | (2) |

where represents the total energy of the system after atomic substitution in the Mo host lattice, denotes the energy per Mo atom in the pristine Mo unit cell, signifies the total energy of the unsubstituted Mo host lattice, and or corresponds to the average energy per atom of the 11 substitution elements in their conventional unit cells.

All computational simulations were conducted utilizing Density Functional Theory (DFT) as integrated within the Vienna Ab-initio Simulation Package (VASP) software[1](#_ENREF_1" \o "Kresse, 1996 #341), [2](#_ENREF_2" \o "Kresse, 1996 #342). We employed the Perdew-Burke-Ernzerhof (PBE) parametrization[2](#_ENREF_2" \o "Kresse, 1996 #342) for the generalized gradient approximation (GGA-PBE)[3](#_ENREF_3" \o "Perdew, 1996 #343), [4](#_ENREF_4" \o "Kresse, 1994 #344) to calculate the exchange-correlation energy. The interactions between core and valence electrons were approximated using Projector-Augmented Wave (PAW) potentials[5](#_ENREF_5" \o "Blöchl, 1994 #366), [6](#_ENREF_6" \o "Kresse, 1999 #367). The kinetic energy cutoff for the wave functions was established at 500 eV. For body-centered cubic molybdenum (BCC-Mo), a Gamma-centered k-mesh of 5 × 5 × 5 was applied to discretize the Brillouin zone (BZ). The total energy calculations were refined to a convergence threshold of 1 × 10-5 eV, while the forces were converged with an accuracy of less than 0.02 eV/Å. Spin-polarized calculations were performed to account for the magnetic properties of the system. Taking into account the dilute concentration of the alloying elements, lattice relaxation was initially carried out within the BCC-Mo systems. Subsequently, ionic relaxation was executed under the constraint of maintaining a constant cell volume and shape.

Elastic constant calculations were implemented through VASP's IBRION module.Enhanced computational parameters included an elevated cutoff energy of 600 eV and stricter convergence criteria (energy: 1×10-8 eV, forces: 0.001 eV/Å). Displacement response calculations followed cubic symmetry constraints, employing four displacement points along each atomic coordinate axis with controlled displacement amplitudes of 0.15 Å to ensure reliable elastic constant determination.

In order to balance the reliability of calculation results and effectively control resource and time consumption, this study selected systems covering all single-site substitution systems and 20 carefully screened First Nearest Neighbor double-site substitution systems for elastic constant calculations (32 systems in total). Two key principles were followed in the system selection process: first, ensuring that all the studied types of alloying elements were included; second, prioritizing systems with substitution energies as negative as possible, aiming to select thermodynamically more stable configurations and obtain more valuable calculation results.

**Text S2** Calculation methods of elastic mechanical properties of Mo alloys

In this work, the elastic mechanical properties are calculated using the Voigt-Reuss-Hill method[7-10](#_ENREF_7" \o "Born, 1996 #345) as follows.

Formula for Bulk modulus (*B*)：

|  | (3) |
| --- | --- |

Formula for Shear modulus(*G*)：

|  | (4) |
| --- | --- |
|  | (5) |
|  | (6) |

Young’s modulus (*E*)：

|  | (7) |
| --- | --- |

Poisson’s ratio ()：

|  | (8) |
| --- | --- |

| **Table S1.** Elementary attributes (66) used in the Center-Environment feature construction in this work. The selected attributes (18) are presented in bold. | | | |
| --- | --- | --- | --- |
| ID | Features | Abbreviate | |
| Center | Environment |
| 1 | Radii metal (Waber) | C_R | E_R |
| 2 | Radii pseudo-potential (Zunger) | C_Rp | E_Rp |
| 3 | **Quantum number** | C_Qn | E_Qn |
| 4 | Radii covalent | C_Rc | E_Rc |
| 5 | Volume of atom (Villars, Daams) | C_Va | E_Va |
| 6 | V2/3 (Miedema) | C_V2/3 | E_V2/3 |
| 7 | **Thermal neutron capture cross section** | C_Tna | E_Tna |
| 8 | Surface tension at Tm | C_StT | E_StT |
| 9 | **Spin nuclei** | C_Sn | E_Sn |
| 10 | **Spectral lines no** | C_Sln | E_Sln |
| 11 | Periodic number start counting top right, right-left sequence | C_Pntrrl | E_Pntrrl |
| 12 | Periodic number start counting left bottom, left-right sequence | C_Pnlblr | E_Pnlblr |
| 13 | Periodic number start counting bottom right, right-left sequence | C_Pnbrrl | E_Pnbrrl |
| 14 | **Oxidation state first** | C_Osf | E_Osf |
| 15 | **nW1/3 (Miedema)** | C_nW1/3 | E_nW1/3 |
| 16 | **Nuclear charge effective (Slater)** | C_Nce | E_Nce |
| 17 | **Moment nuclear magnetic** | C_Mnm | E_Mnm |
| 18 | **Molar heat capacity** | C_Mhc | E_Mhc |
| 19 | Mendeleev t-d start right | C_Mtdr | E_Mtdr |
| 20 | Mendeleev t-d start left | C_Mtdl | E_Mtdl |
| 21 | Mendeleev Pettifor regular | C_MPr | E_MPr |
| 22 | Mendeleev Pettifor | C_MP | E_MP |
| 23 | Mendeleev H t-d start right | C_MHtdr | E_MHtdr |
| 24 | Mendeleev H t-d start left | C_MHtdl | E_MHtdl |
| 25 | Mendeleev H d-t start right | C_MHdtr | E_MHdtr |
| 26 | Mendeleev H d-t start left | C_MHdtl | E_MHdtl |
| 27 | Mendeleev d-t start right | C_Mdtr | E_Mdtr |
| 28 | Mendeleev d-t start left | C_Mdtl | E_Mdtl |
| 29 | Mendeleev chemists sequence | C_Mcs | E_Mcs |
| 30 | **Melting temperature** | C_Mt | E_Mt |
| 31 | Mass attenuation coefficient for MoKα | C_MacMo | E_MacMo |
| 32 | Mass attenuation coefficient for CuKα | C_MacCu | E_MacCu |
| 33 | **Mass attenuation coefficient FeKα** | C_MacFe | E_MacFe |
| 34 | Mass attenuation coefficient CrKα | C_MacCr | E_MacCr |
| 35 | **Magnetic resonance** | C_Mr | E_Mr |
| 36 | Magnetic frequency of nuclei | C_Mfn | E_Mfn |
| 37 | Group number | C_Gn | E_Gn |
| 38 | **Entropy of solid** | C_Es | E_Es |
| 39 | Enthalpy of vaporization | C_Ev | E_Ev |
| ID | Features | Abbreviate | |
| Center | Environment |
| 40 | Enthalpy of vacancies (Miedema) | C_EvM | E_EvM |
| 41 | Enthalpy of surface (Miedema) | C_EsM | E_EsM |
| 42 | Enthalpy of melting | C_Em | E_Em |
| 43 | Enthalpy of atomization | C_Eat | E_Eat |
| 44 | Energy of ionization first | C_Eif | E_Eif |
| 45 | Energy of ionization second | C_Eis | E_Eis |
| 46 | Energy of ionization third | C_Eit | E_Eit |
| 47 | Energy cohesive (Brewer) | C_Ec | E_Ec |
| 48 | **Electronegativity absolute** | C_Eab | E_Eab |
| 49 | Electronegativity (Martynov&Batsanov) | C_EMB | E_EMB |
| 50 | **Electronegativity (Alfred-Rochow)** | C_EAR | E_EAR |
| 51 | Electronegativity (Pauling) | C_EP | E_EP |
| 52 | **Electrochemical weight equivalent** | C_Ewe | E_Ewe |
| 53 | valence electron (Schubert) | C_veS | E_veS |
| 54 | Distance from core electron (Schubert) | C_Dce | E_Dce |
| 55 | Density | C_D | E_D |
| 56 | **Debye temperature** | C_Dt | E_Dt |
| 57 | **Conductivity thermal** | C_Ct | E_Ct |
| 58 | Conductivity electrical | C_Ce | E_Ce |
| 59 | Compression modulus | C_Cm | E_Cm |
| 60 | Chemical potential (Miedema) | C_Cp | E_Cp |
| 61 | Charge nuclear effective (Clementi) | C_Cne | E_Cne |
| 62 | Boiling temperature | C_Bt | E_Bt |
| 63 | Atomic weight | C_Aw | E_Aw |
| 64 | Atomic concentration | C_Ac | E_Ac |
| 65 | Atomic number start counting left top, left-right sequence | C_Anltlr | E_Anltlr |
| 66 | Atomic electron scattering factor at 0.5 | C_Aesf | E_Aesf |

| **Table S2** Ranges of hyper-parameters in the various ML models used in this work. | | |
| --- | --- | --- |
| **Regression algorithm** | **Parameter List** | **Range** |
| BayesianRidge | Alpha_1 | 1e-2 -- 1e3 |
| Alpha_1 | 1e-2 -- 1e3 |
| Lambda_1 | 1e-2 -- 1e3 |
| Lambda_2 | 1e-2 -- 1e3 |
| KNN | N_neighbors | 2 -- 20 |
| weights | Uniform, distance |
| p | 1, 2, 3 |
| RandomForest | N_estimators | 50 -- 200 |
| Max_depth | 3 -- 8 |
| Min_samples_split | 2 -- 50 |
| Min_samples_leaf | 1 -- 20 |
| Random_state | 0 -- 200 |
| SVR (rbf) | C | 1e-2 -- 1e5 |
| epsilon | 1e-3 -- 1 |
| gamma | 1e-3 -- 1e3 |
| XGBoost | N_estimators | 50 -- 200 |
| Max_depth | 3 -- 8 |
| Learning_rate | 0.001-- 0.01 |
| subsample | 0.6 -- 0.8 |
| gamma | 0.01 -- 0.1 |
| Colsample_bytree | 0.6 -- 0.8 |
| Random_state | 0 -- 200 |

**
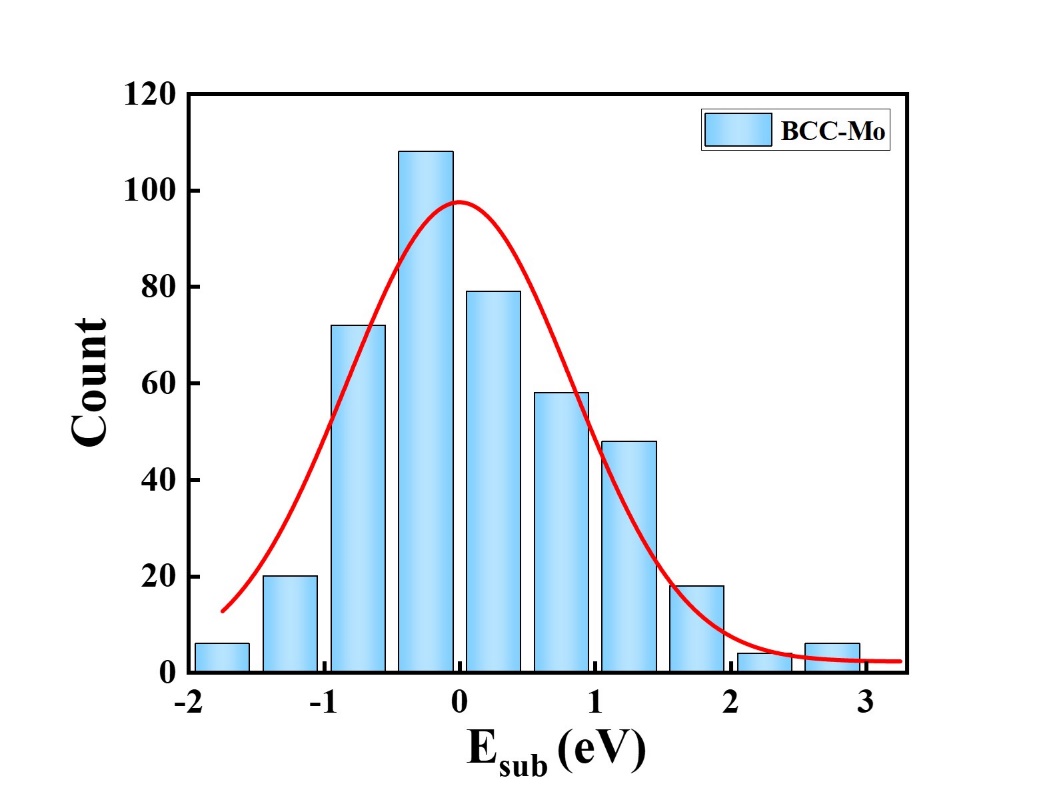
**

**Fig. S1** Distribution of DFT substitution energies in BCC Mo alloys used as training and test datasets in this work.


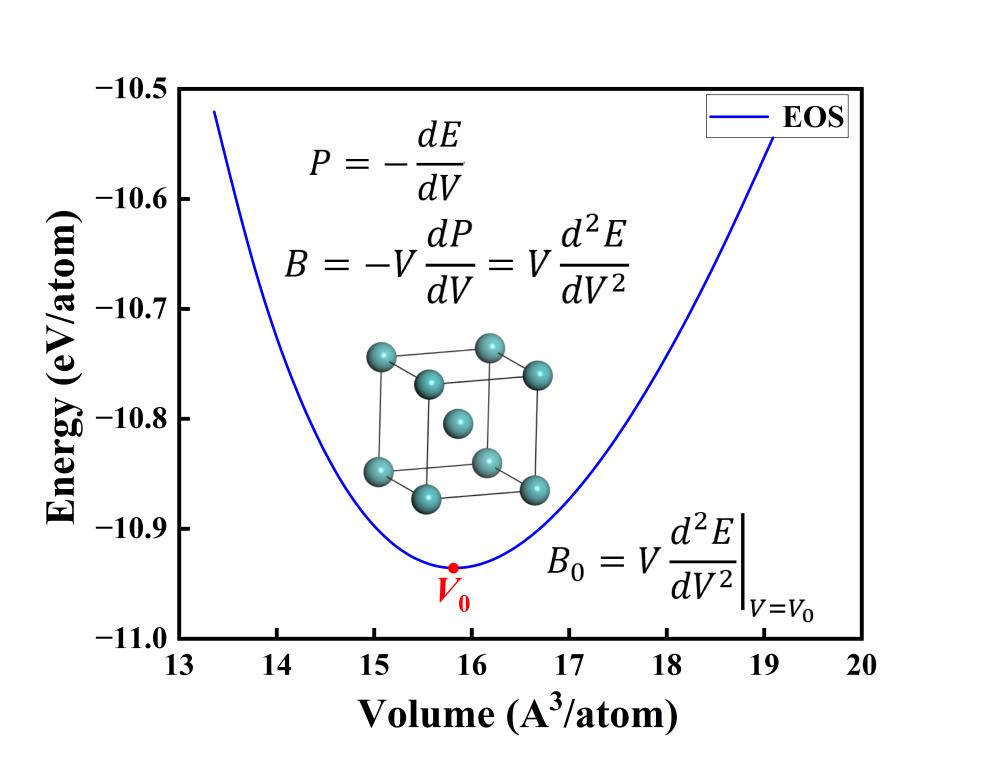


**Fig. S2** Schematic plot of potential energy surface or equation of states of a crystal system as a function of volume where *E* represents the total energy of the system, *V* stands for the volume, *F* denotes the pressure, and *B* is the bulk modulus.

| 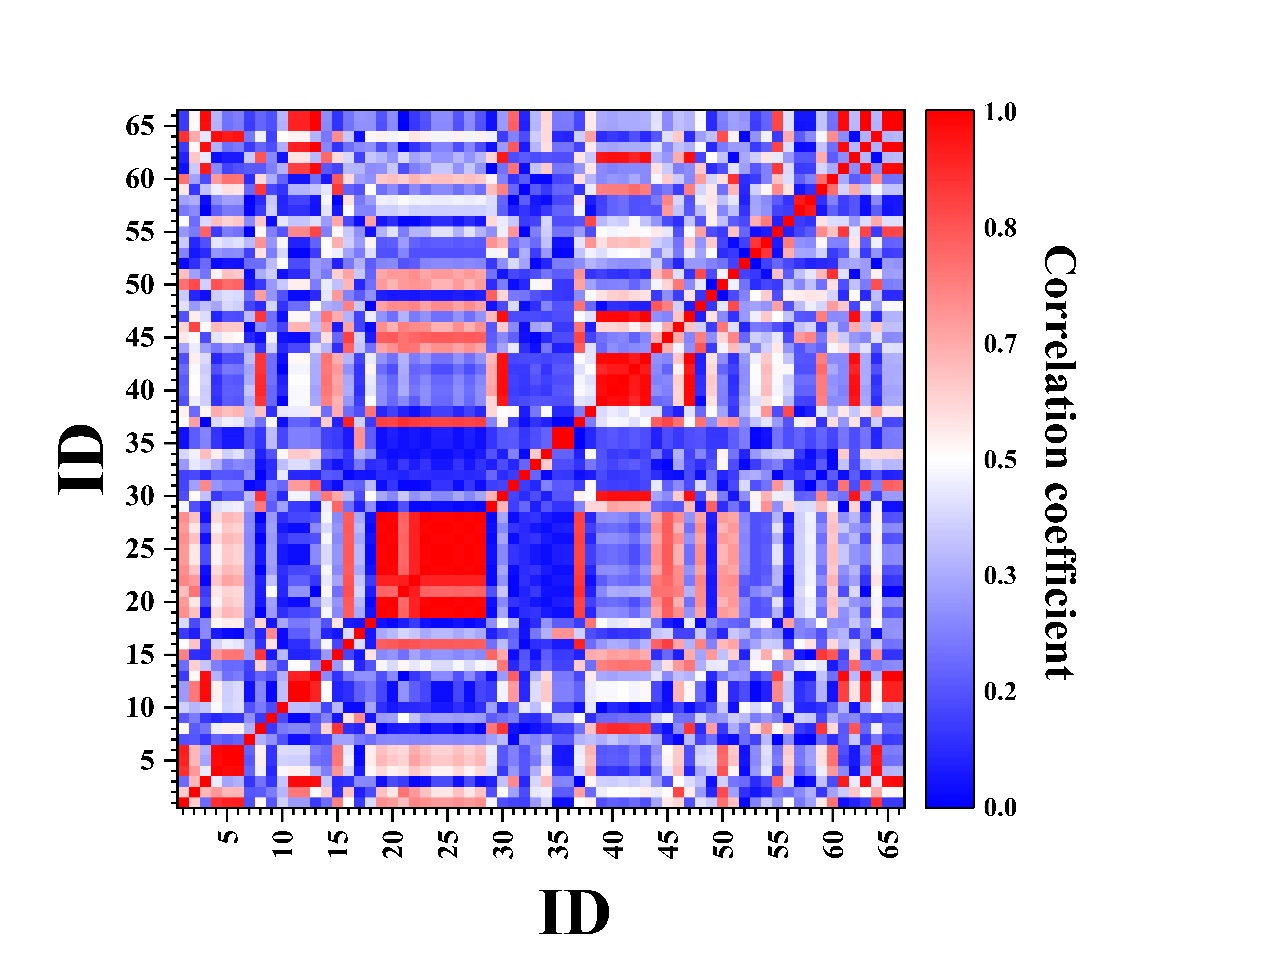 |
| --- |
| **Fig. S3** Correlation heatmap of the initial features (66) before the hierarchical unsupervised feature selection. The feature ID are referred to Table S1. |

| 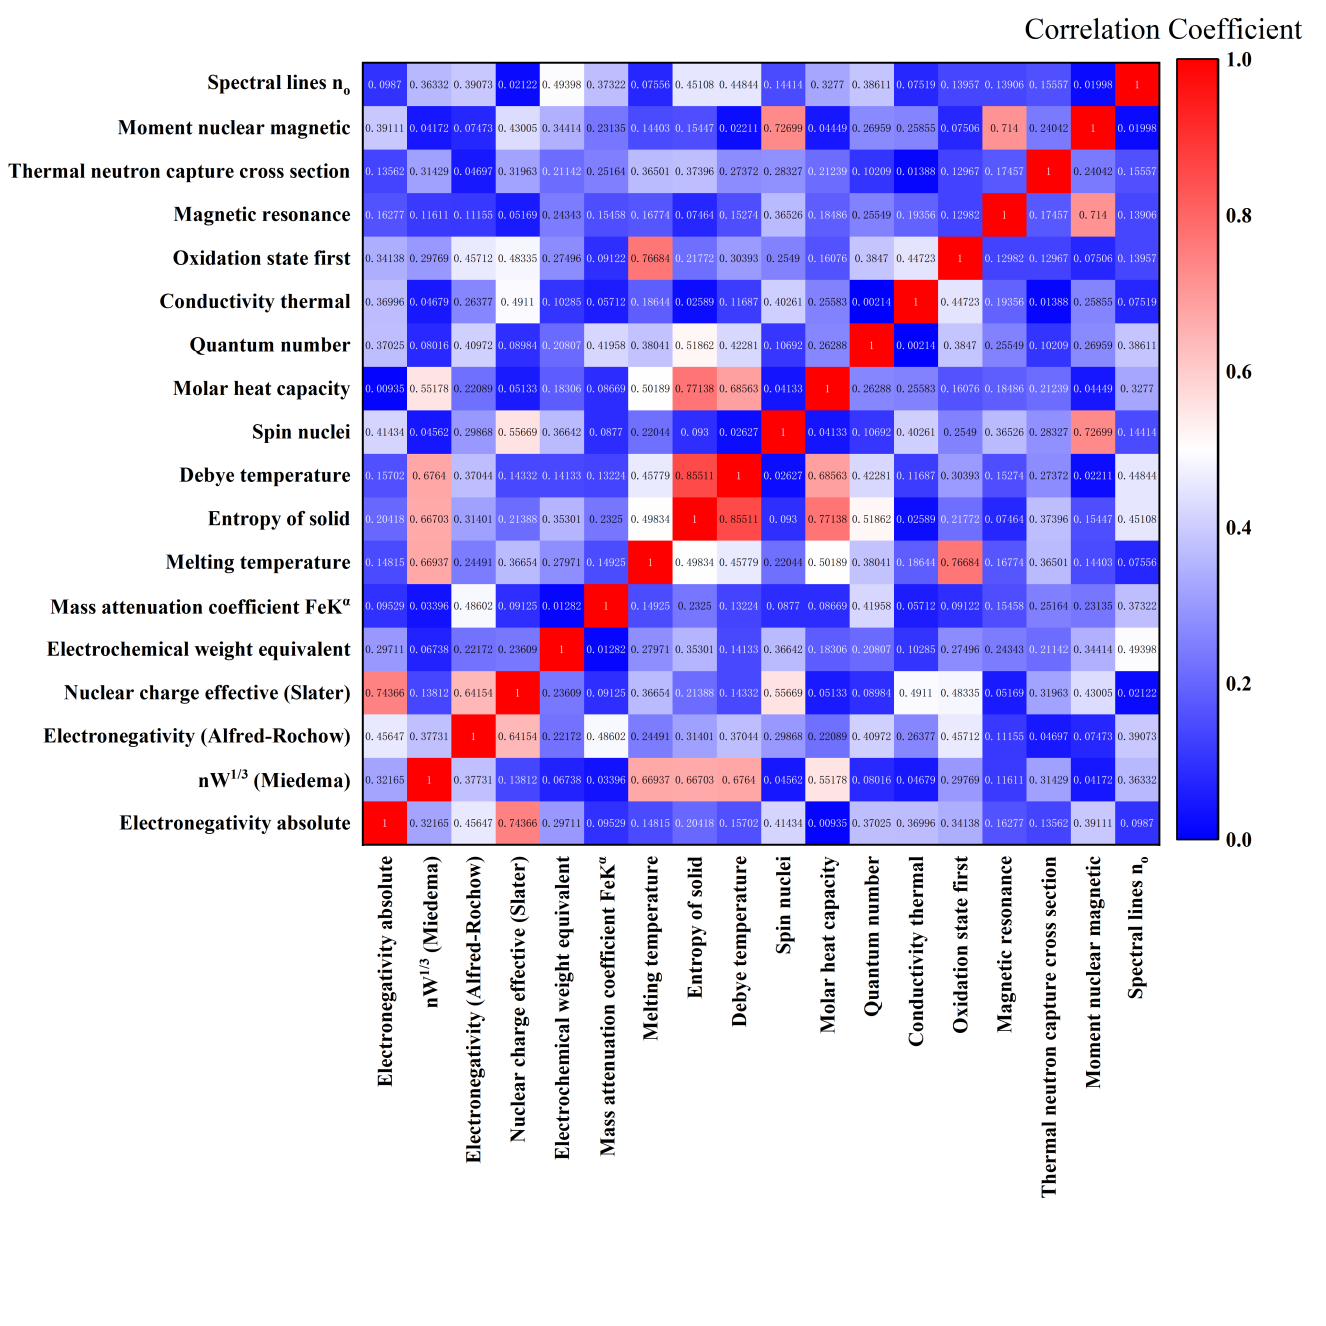 |
| --- |
| **Fig. S4** Correlation heatmap of the features (18) after the hierarchical unsupervised feature selection. The feature labels are referred to Table S1. |

| **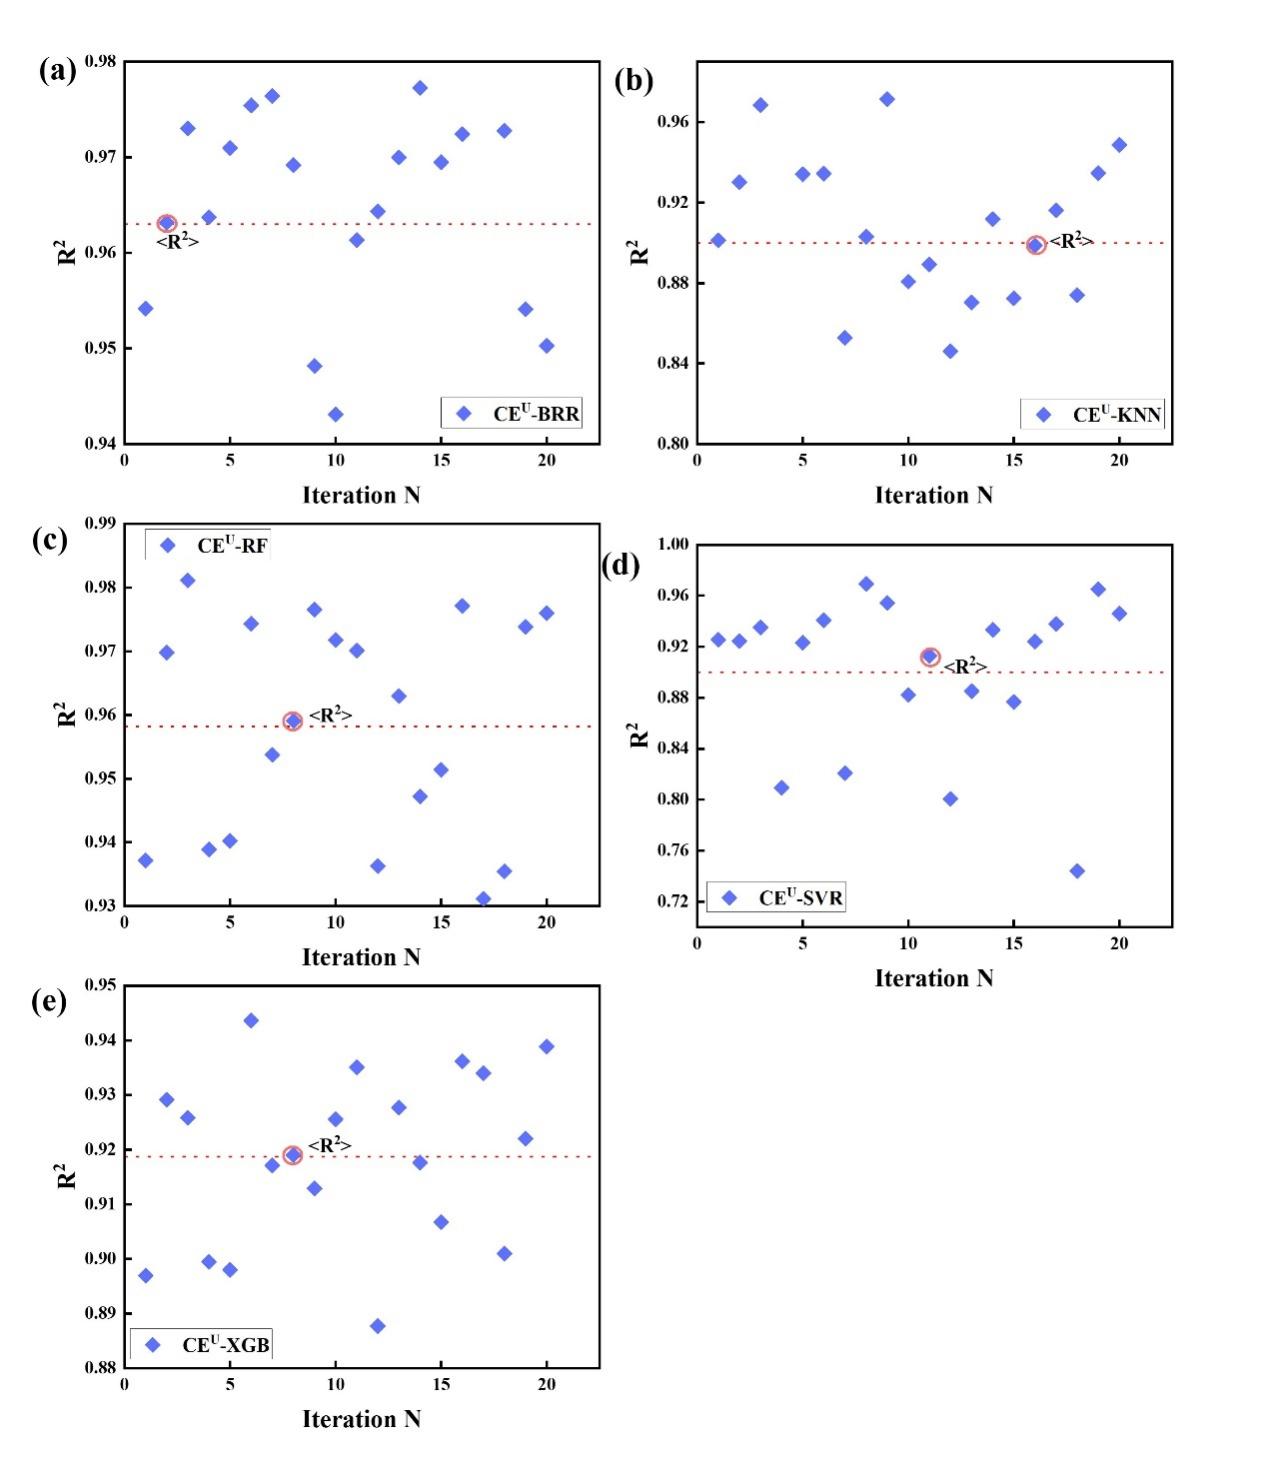**  **Fig. S5** *R2* values of each test dataset across 20 iterations for (a) CEU-BRR, (b) CEU-KNN, (c) CEU-RF, (d) CEU-SVR, and (e) CEU-XGB models with the initial unselected CE features. |
| --- |

| 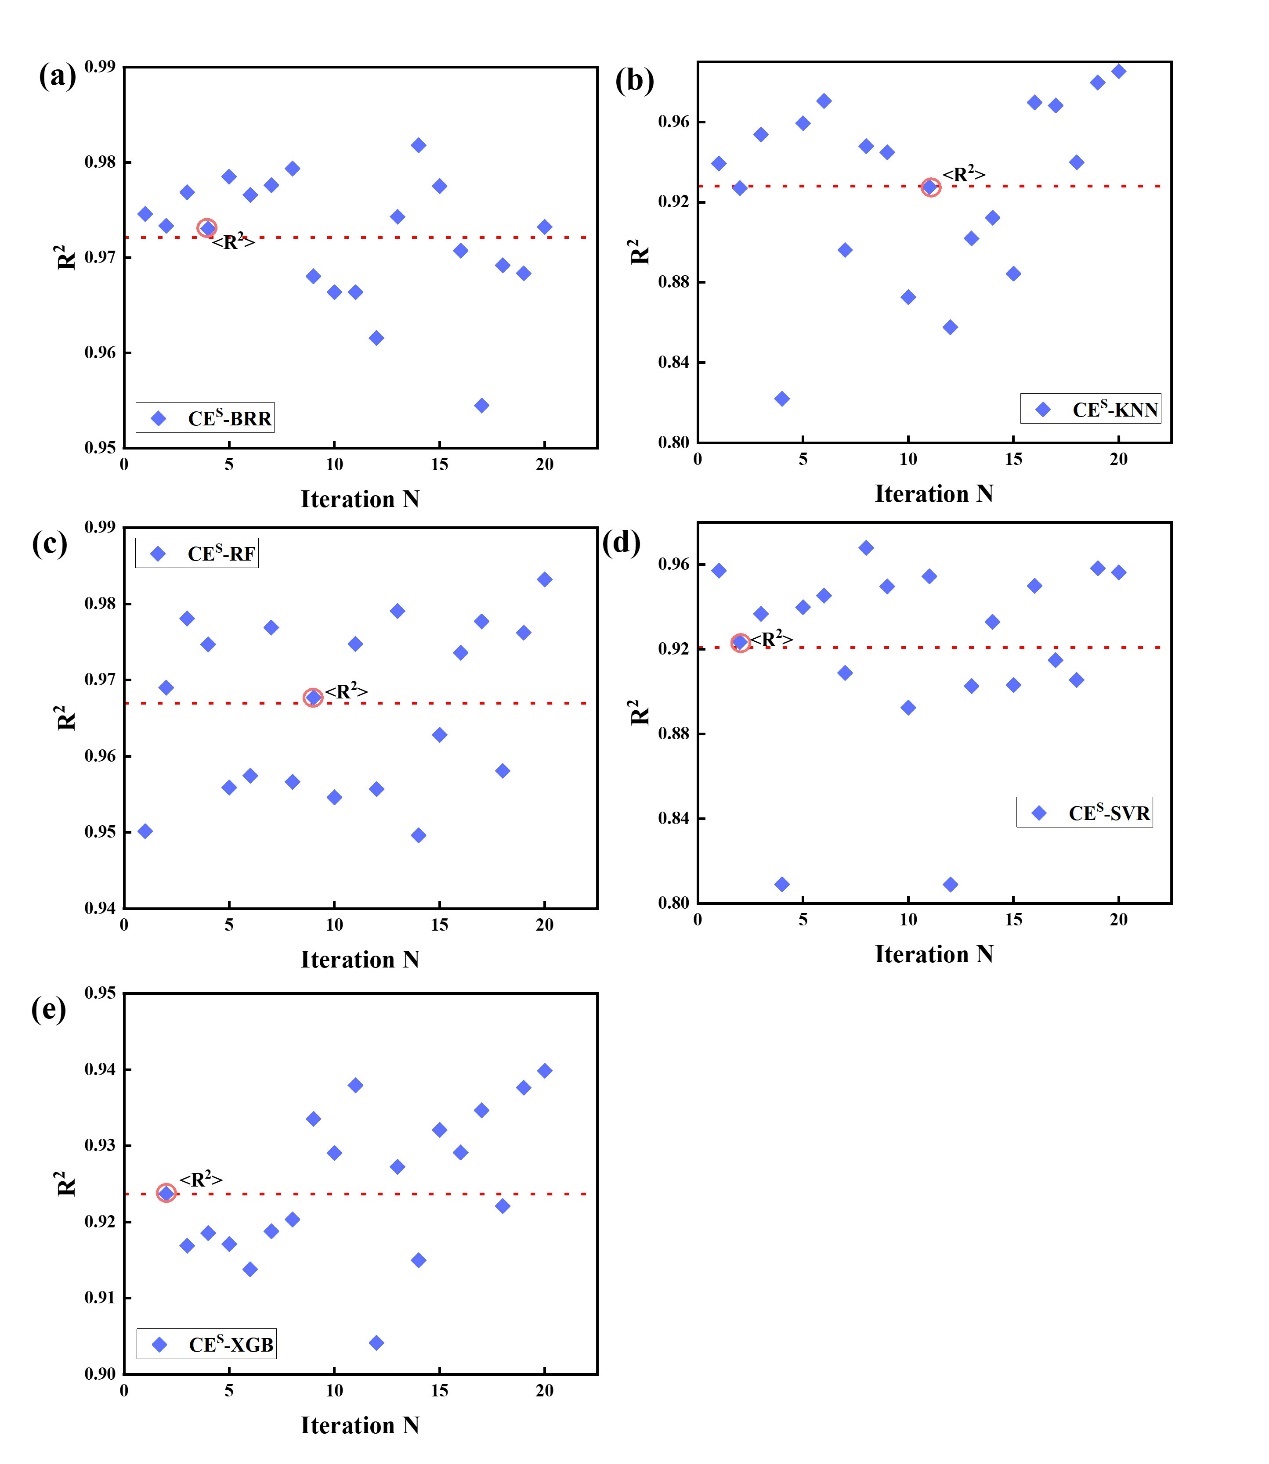 |
| --- |
| **Fig. S6** *R2* values of each test dataset across 20 iterations for (a) CES-BRR, (b) CES-KNN, (c) CES-RF, (d) CES-SVR, and (e) CES-XGB models with the selected CE features. |

| 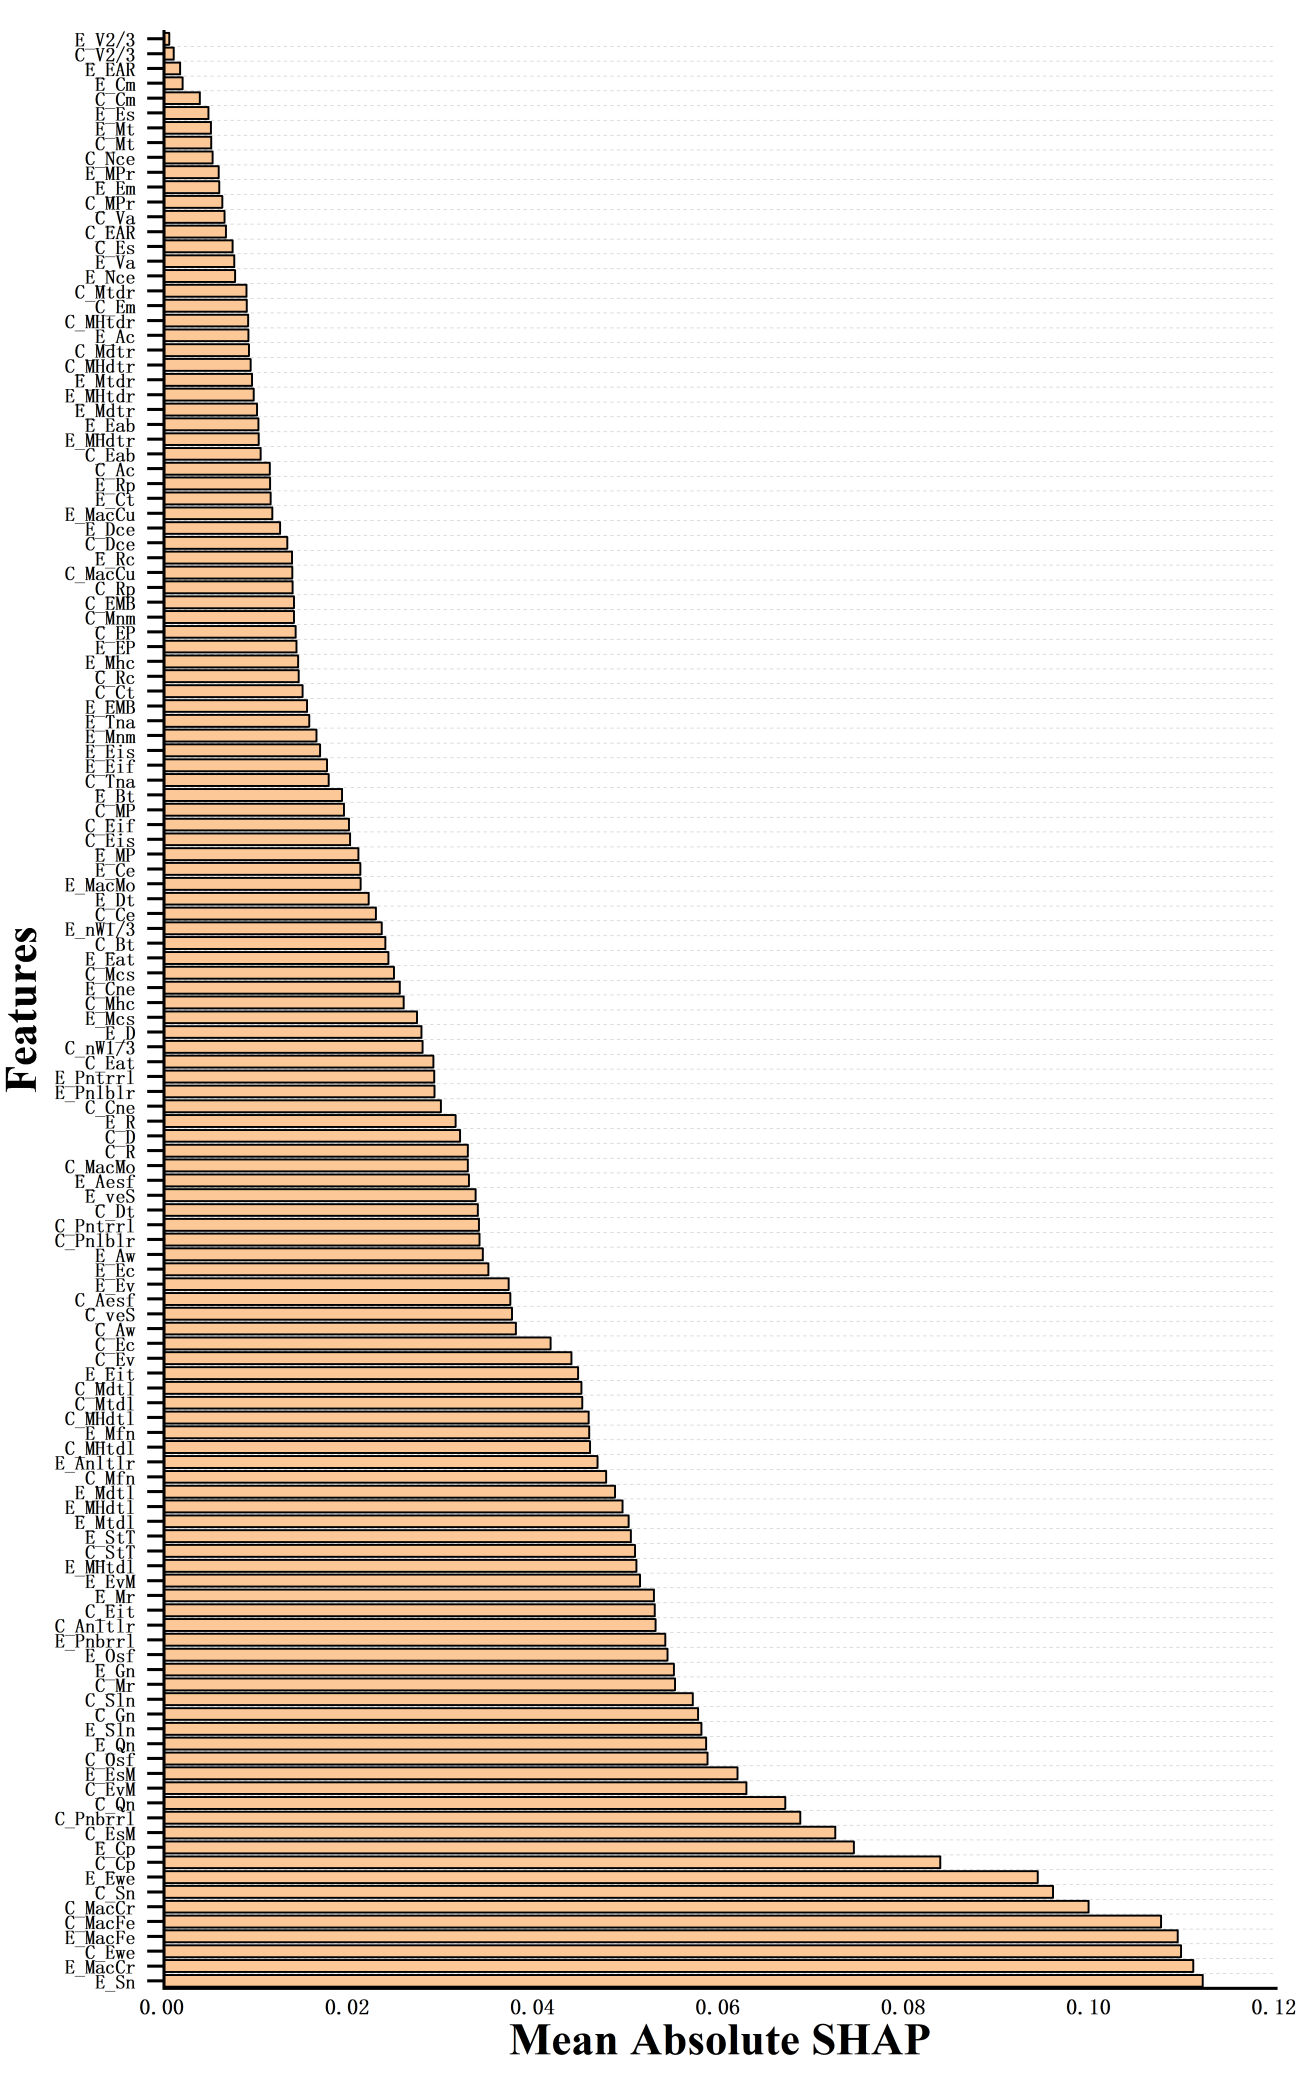 |
| --- |
| **Fig. S7** Feature importance via SHAP analysis of the CEU-BRR model. |
| 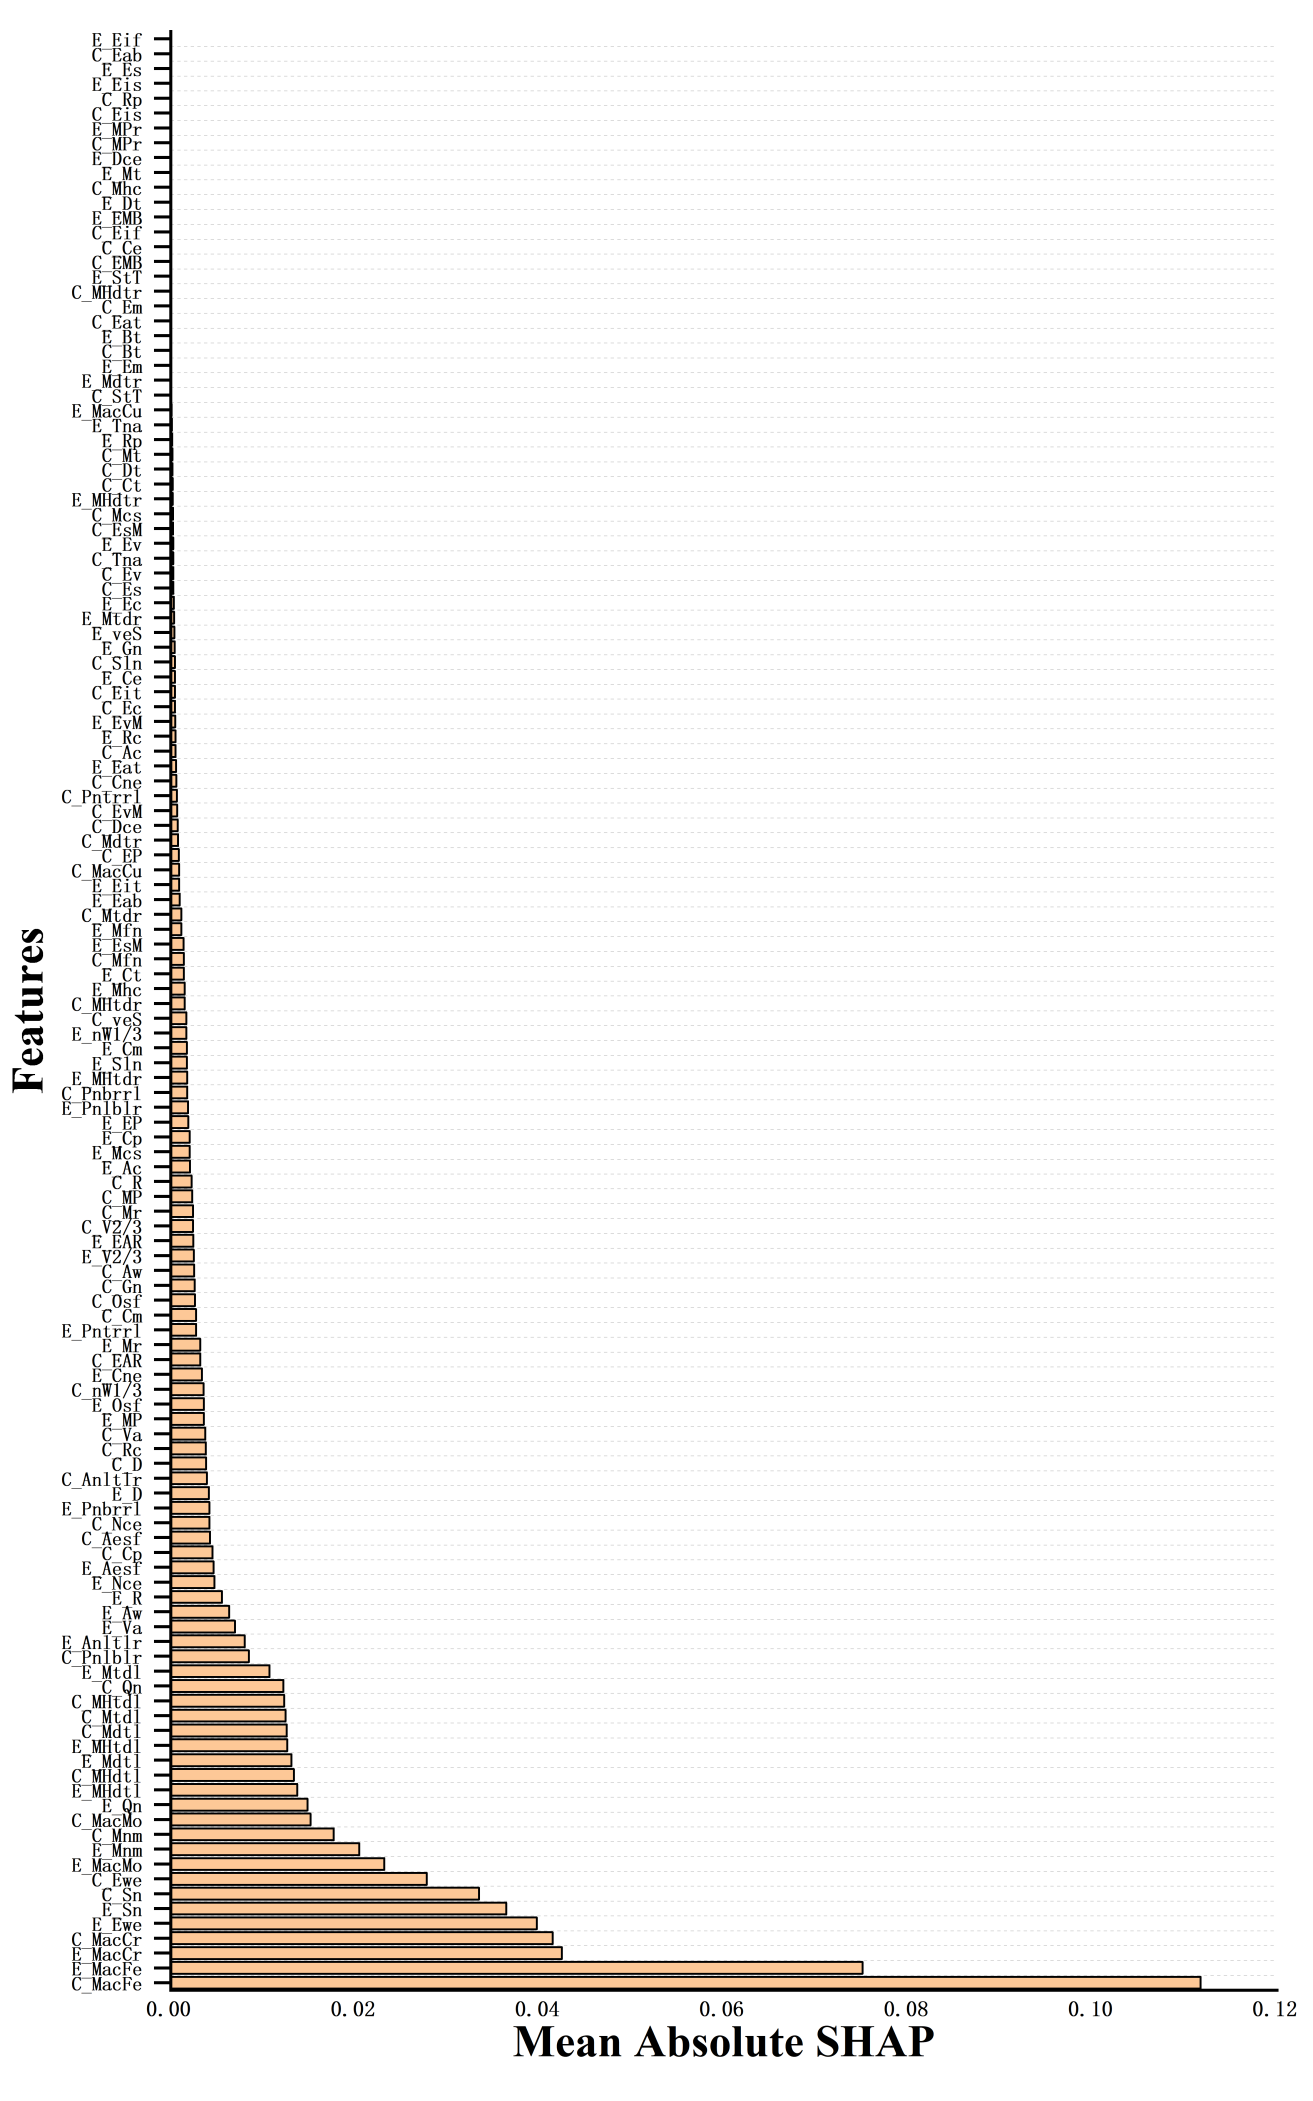 |
| **Fig. S8** Feature importance via SHAP analysis of the CEU-KNN model. |
| 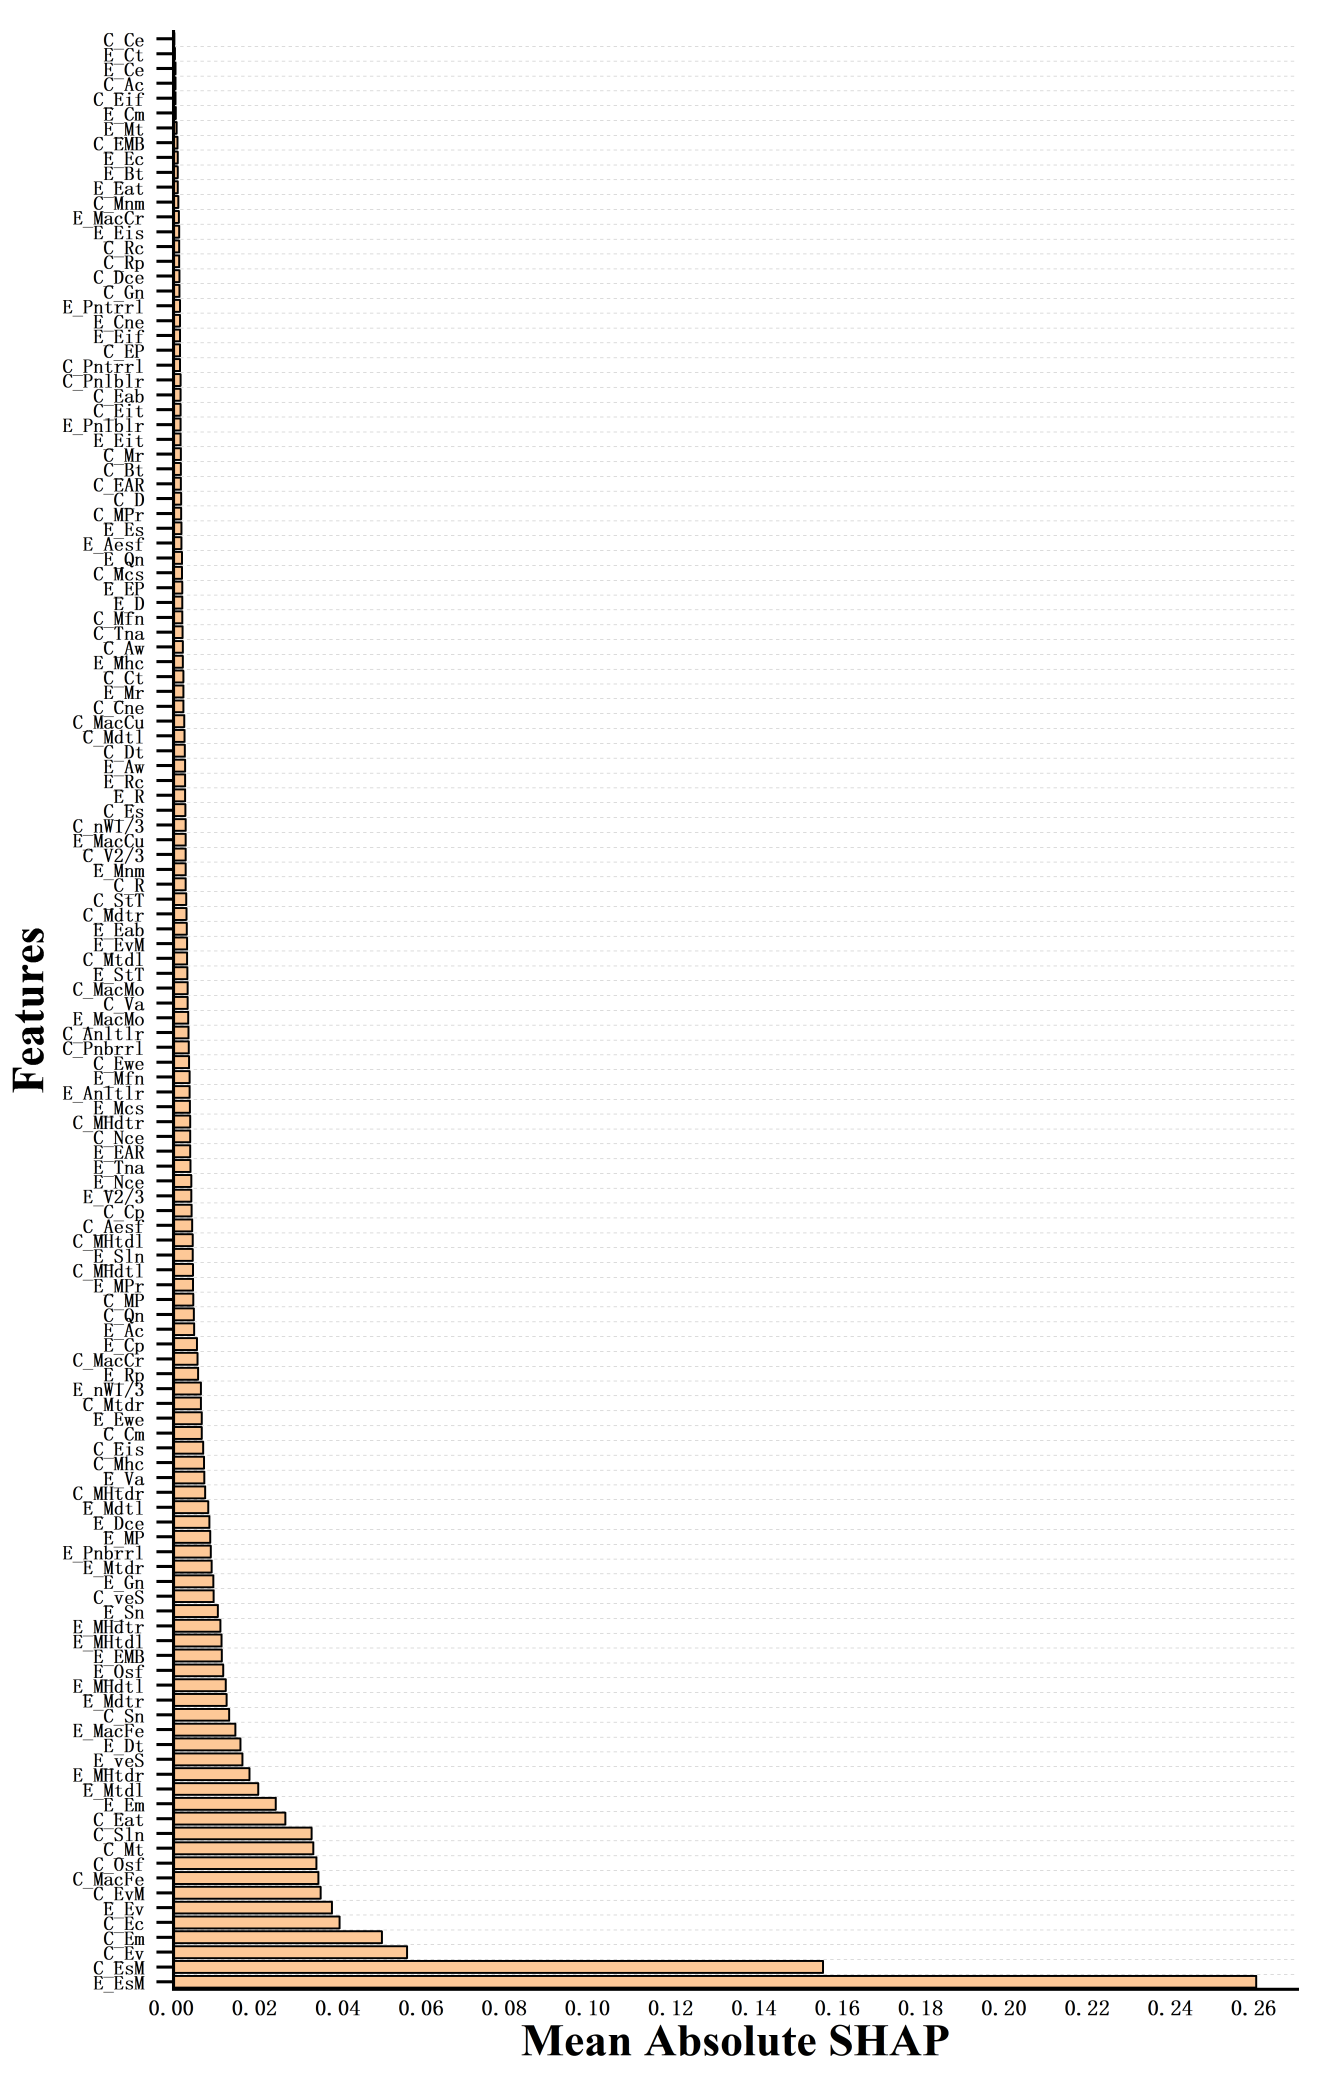 |
| **Fig. S9** Feature importance via SHAP analysis of the CEU-RF model. |
| 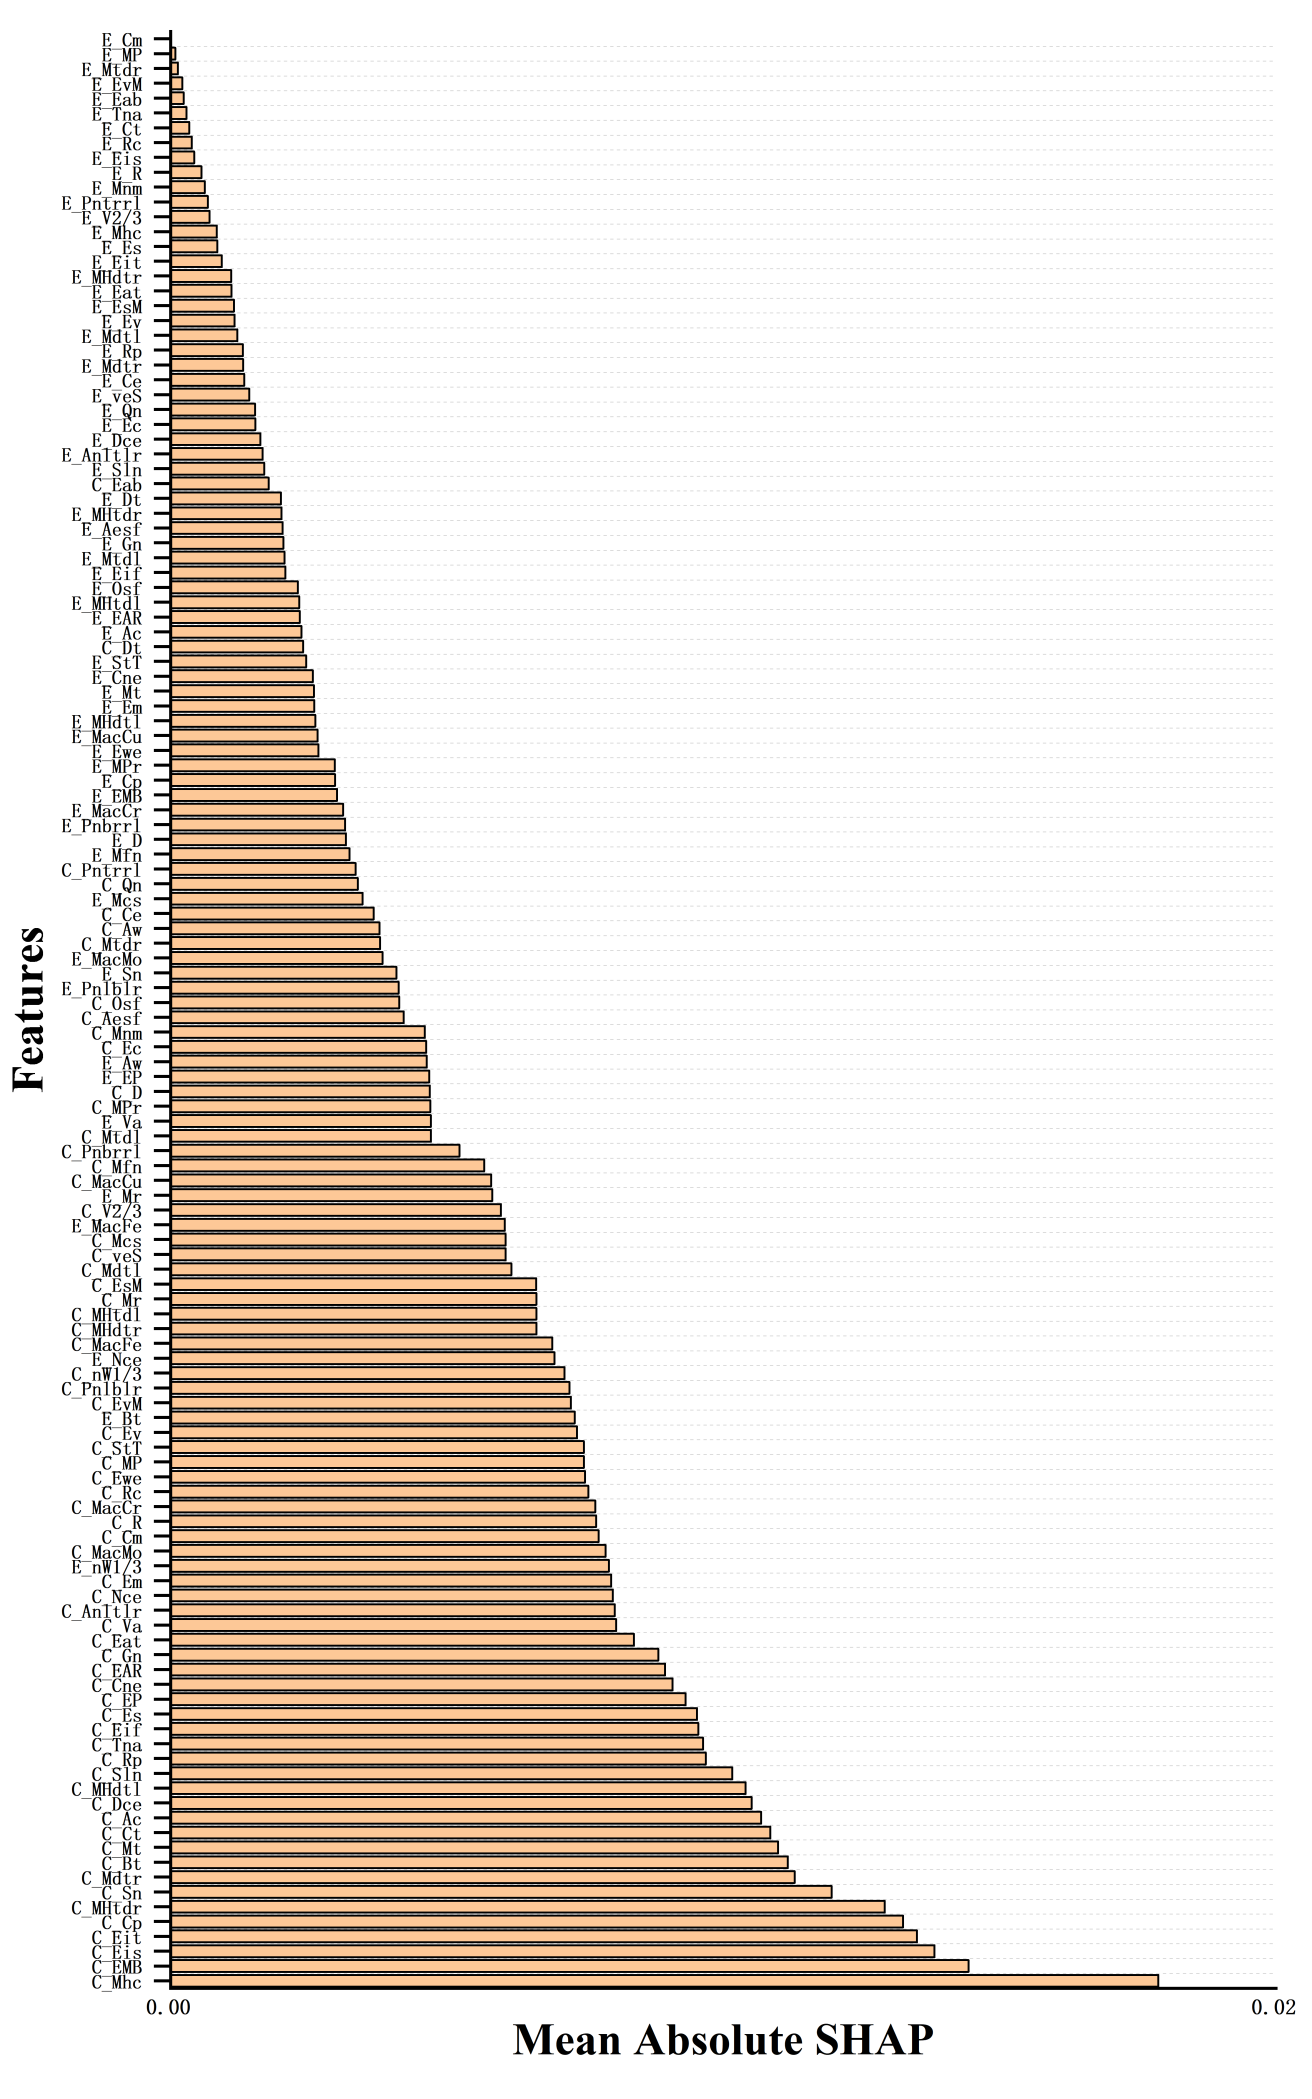 |
| **Fig. S10** Feature importance via SHAP analysis of the CEU-SVR model. |
| 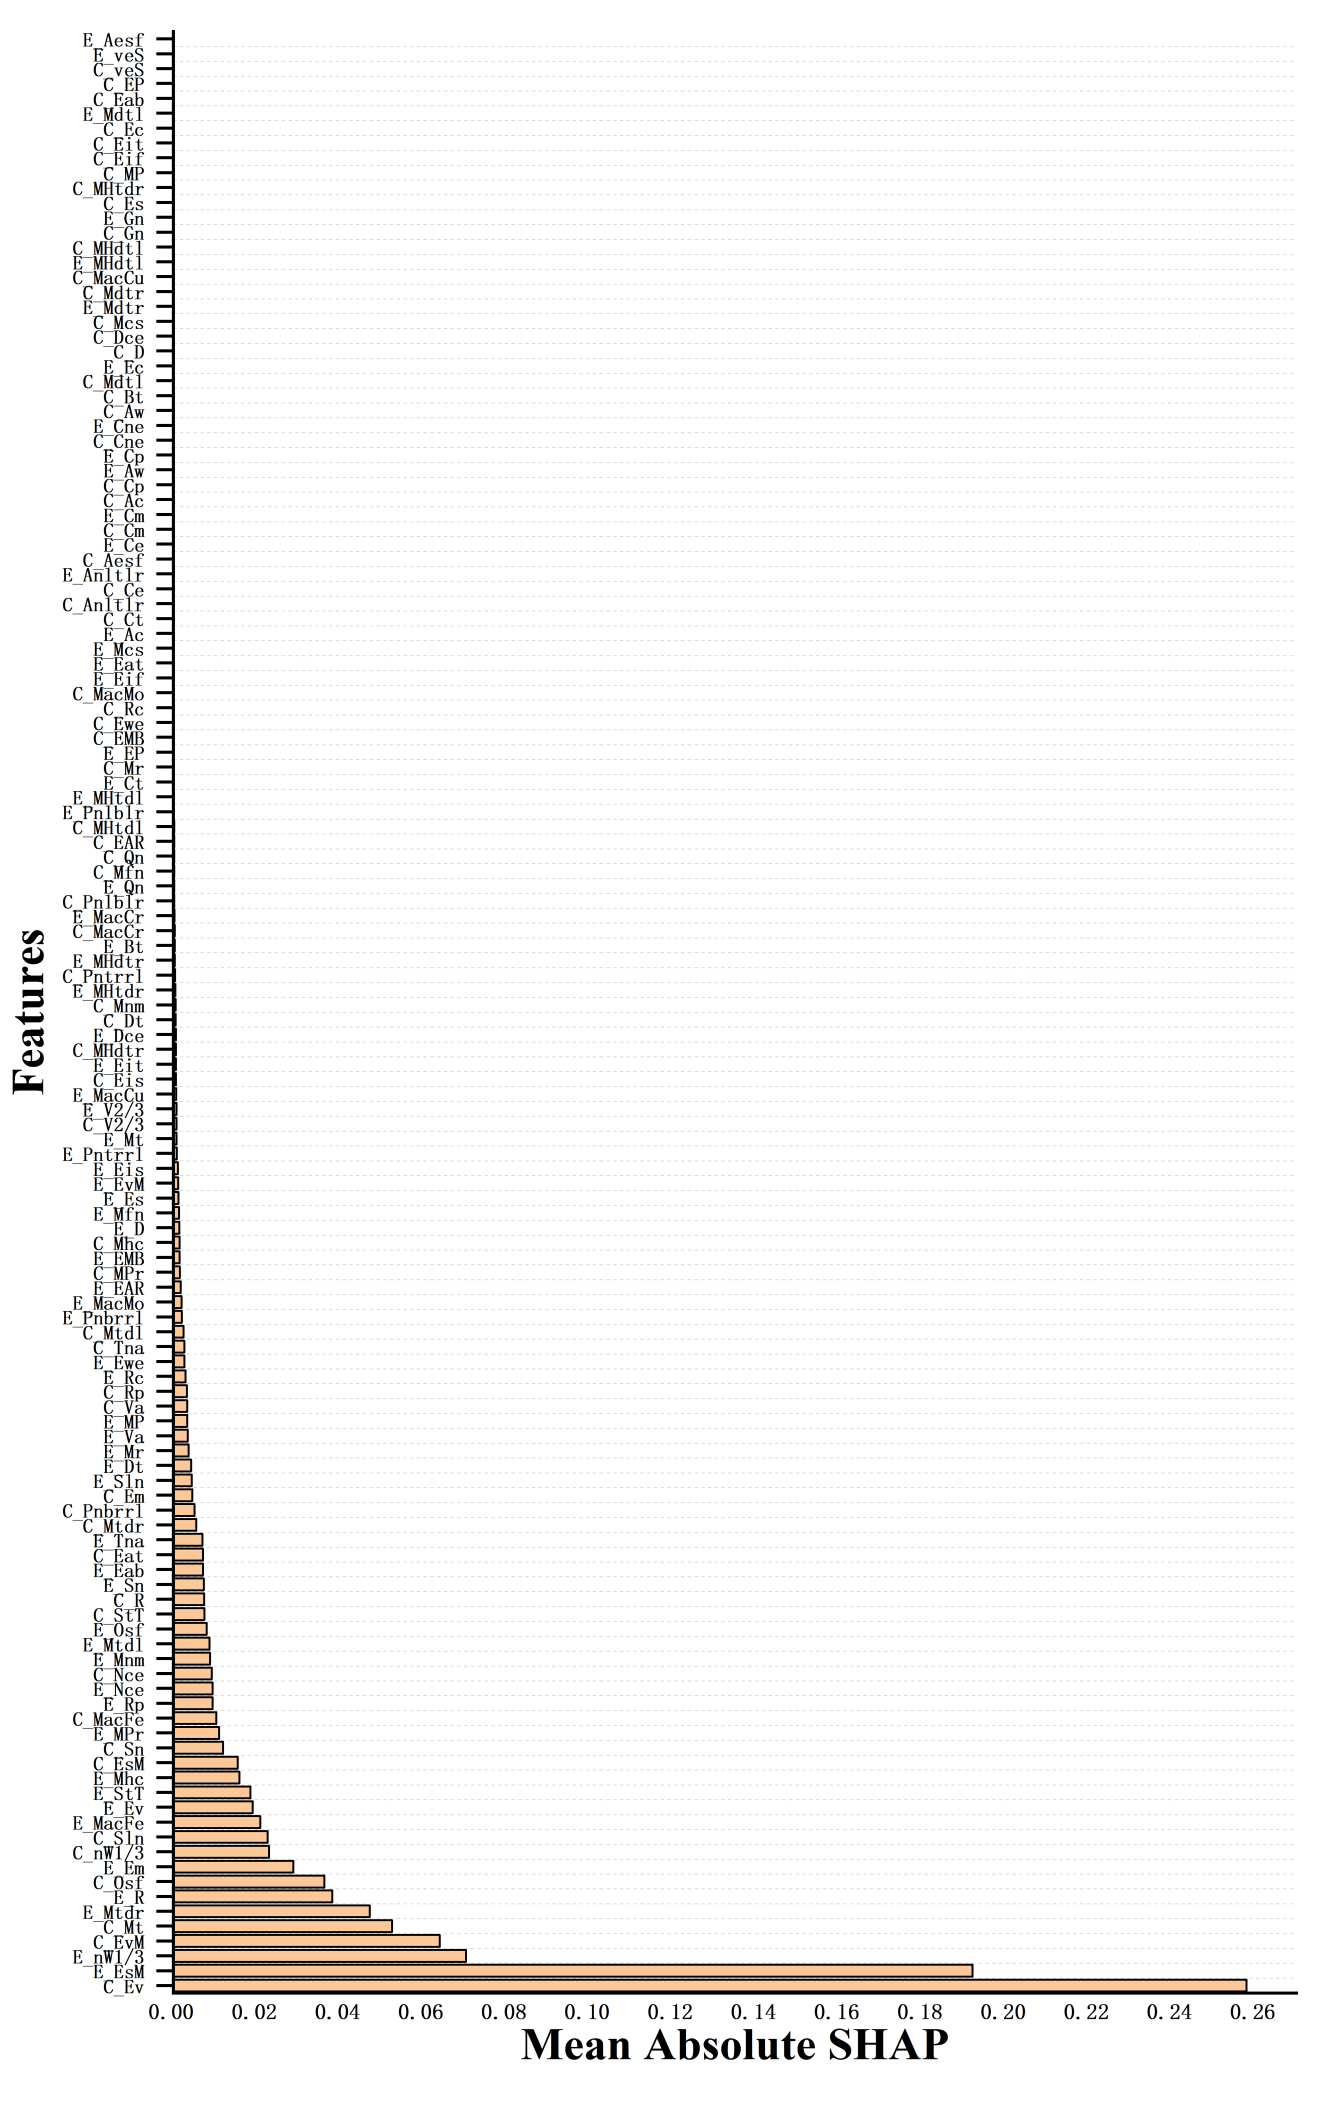 |
| **Fig. S11** Feature importance via SHAP analysis of the CEU-XGB model. |
| 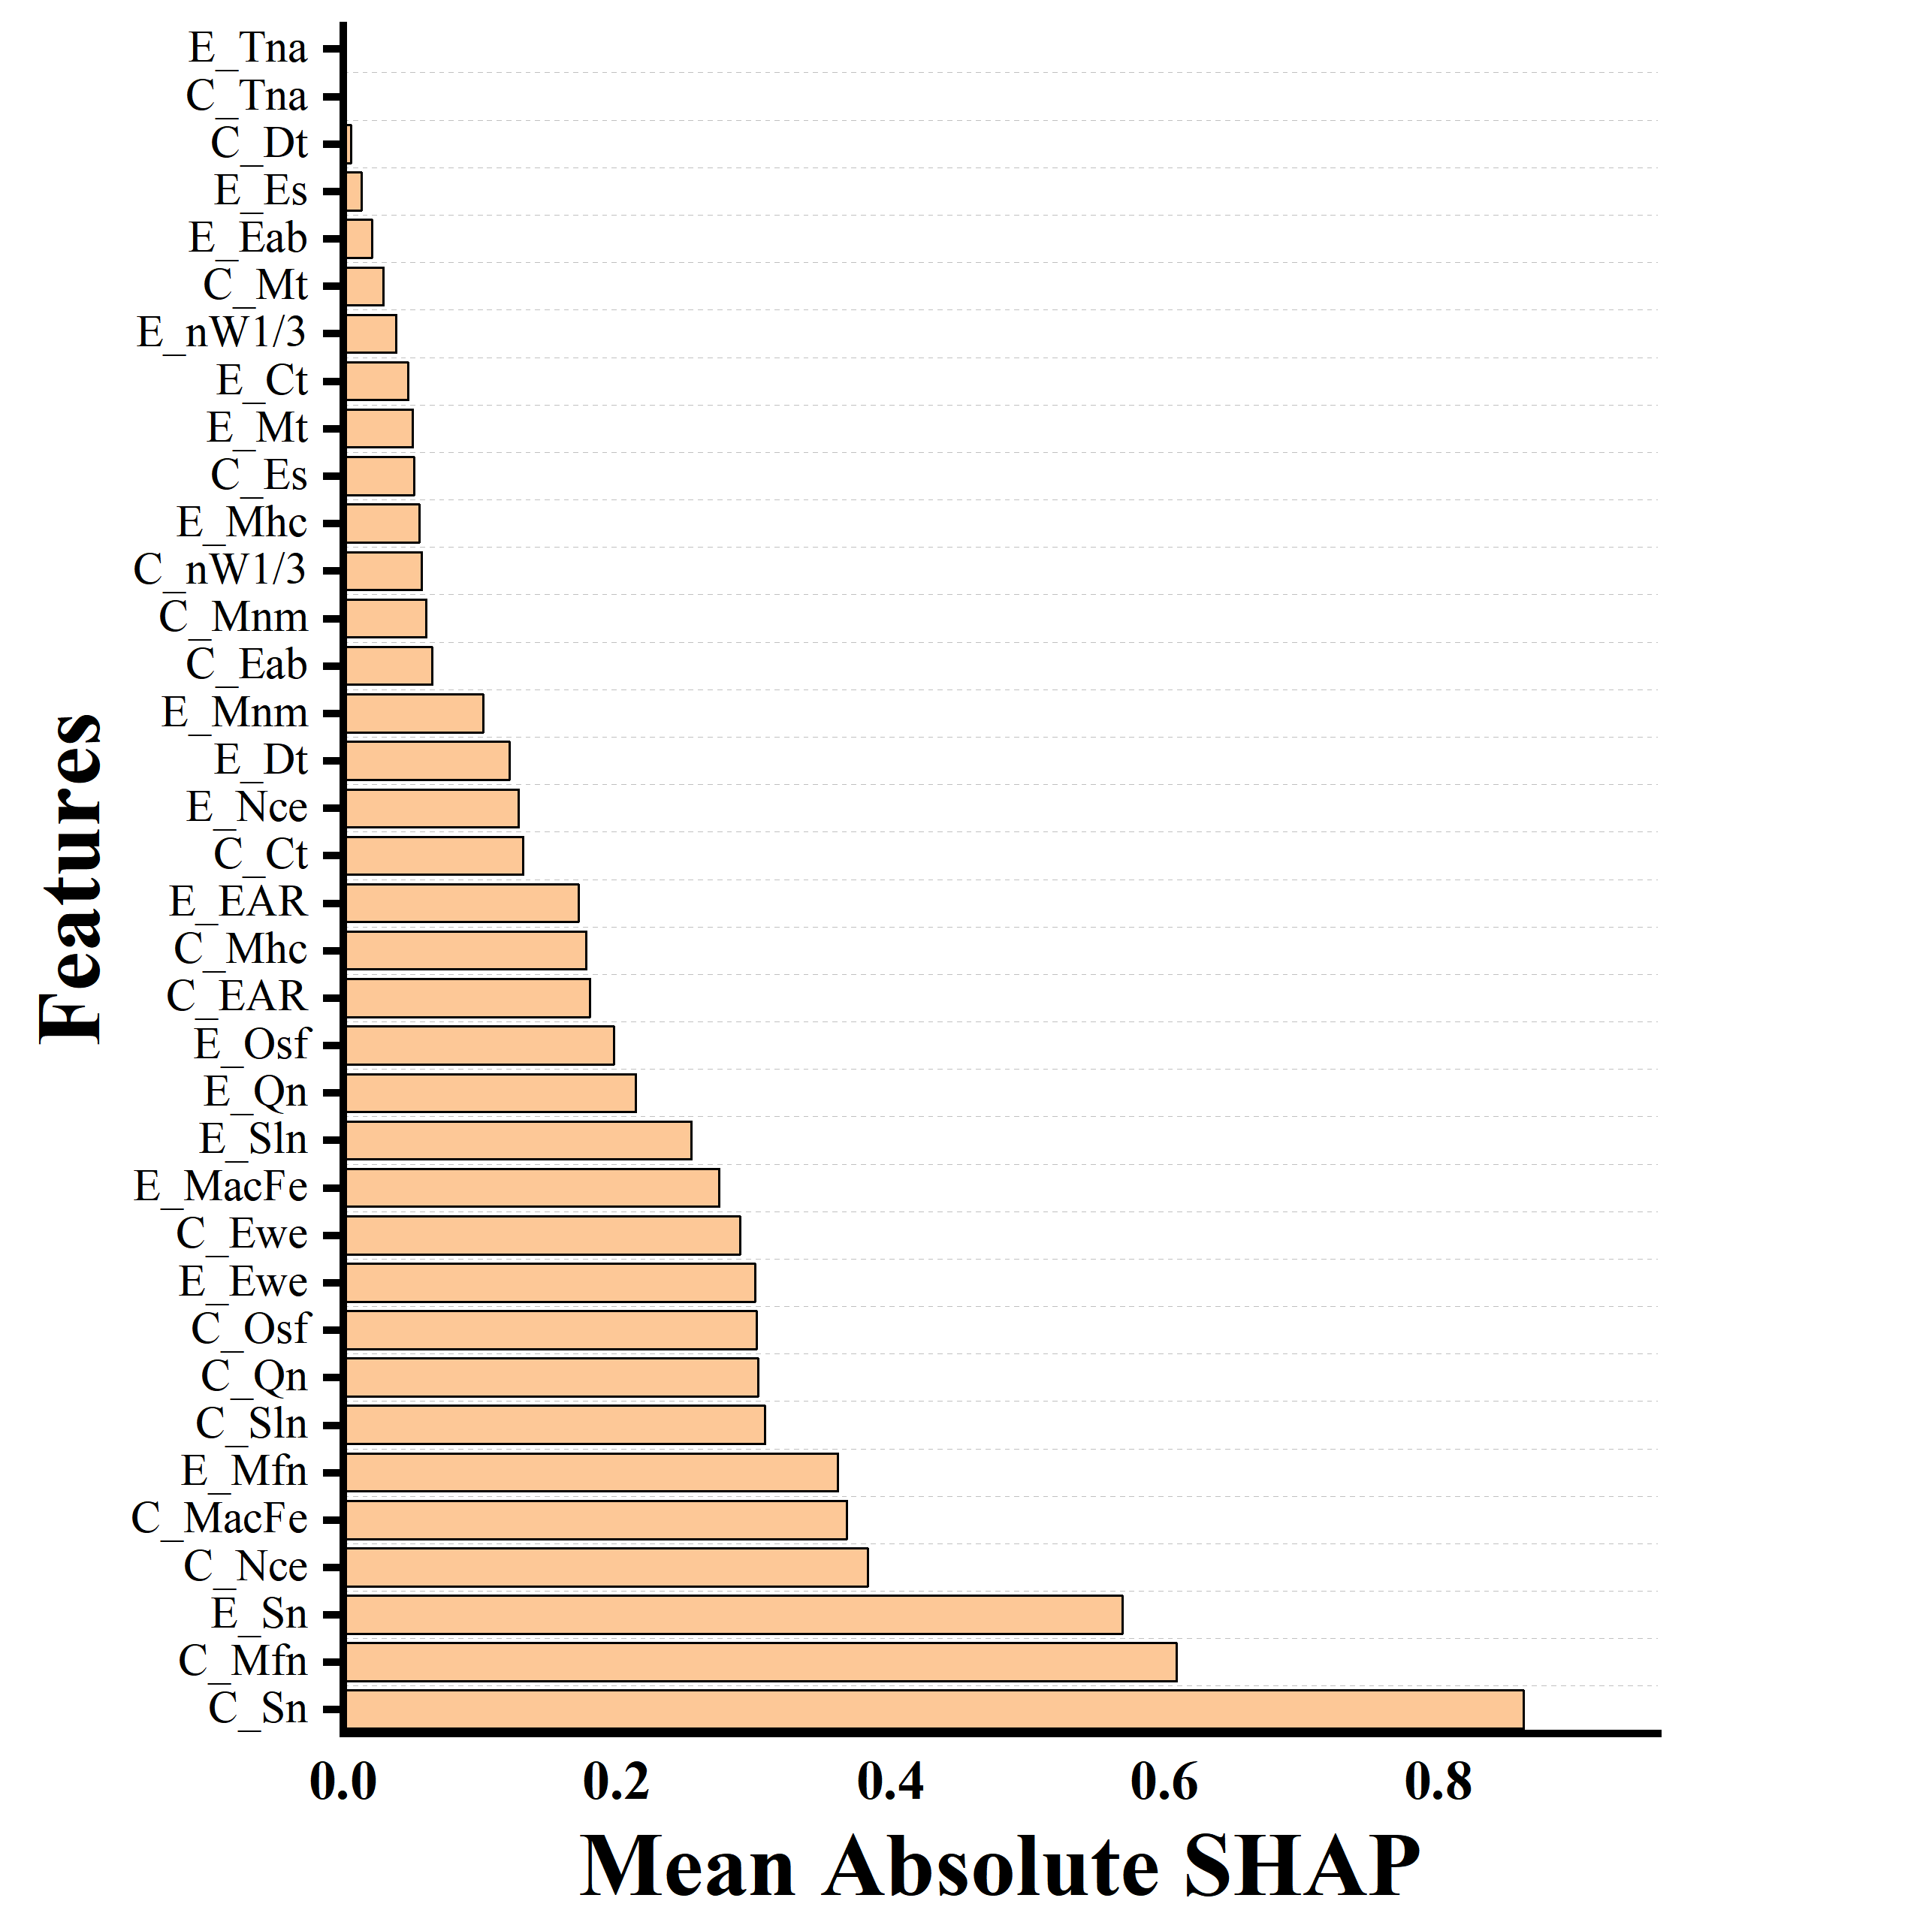 |
| **Fig. S12** Feature importance via SHAP analysis of the CES-BRR model. |

| 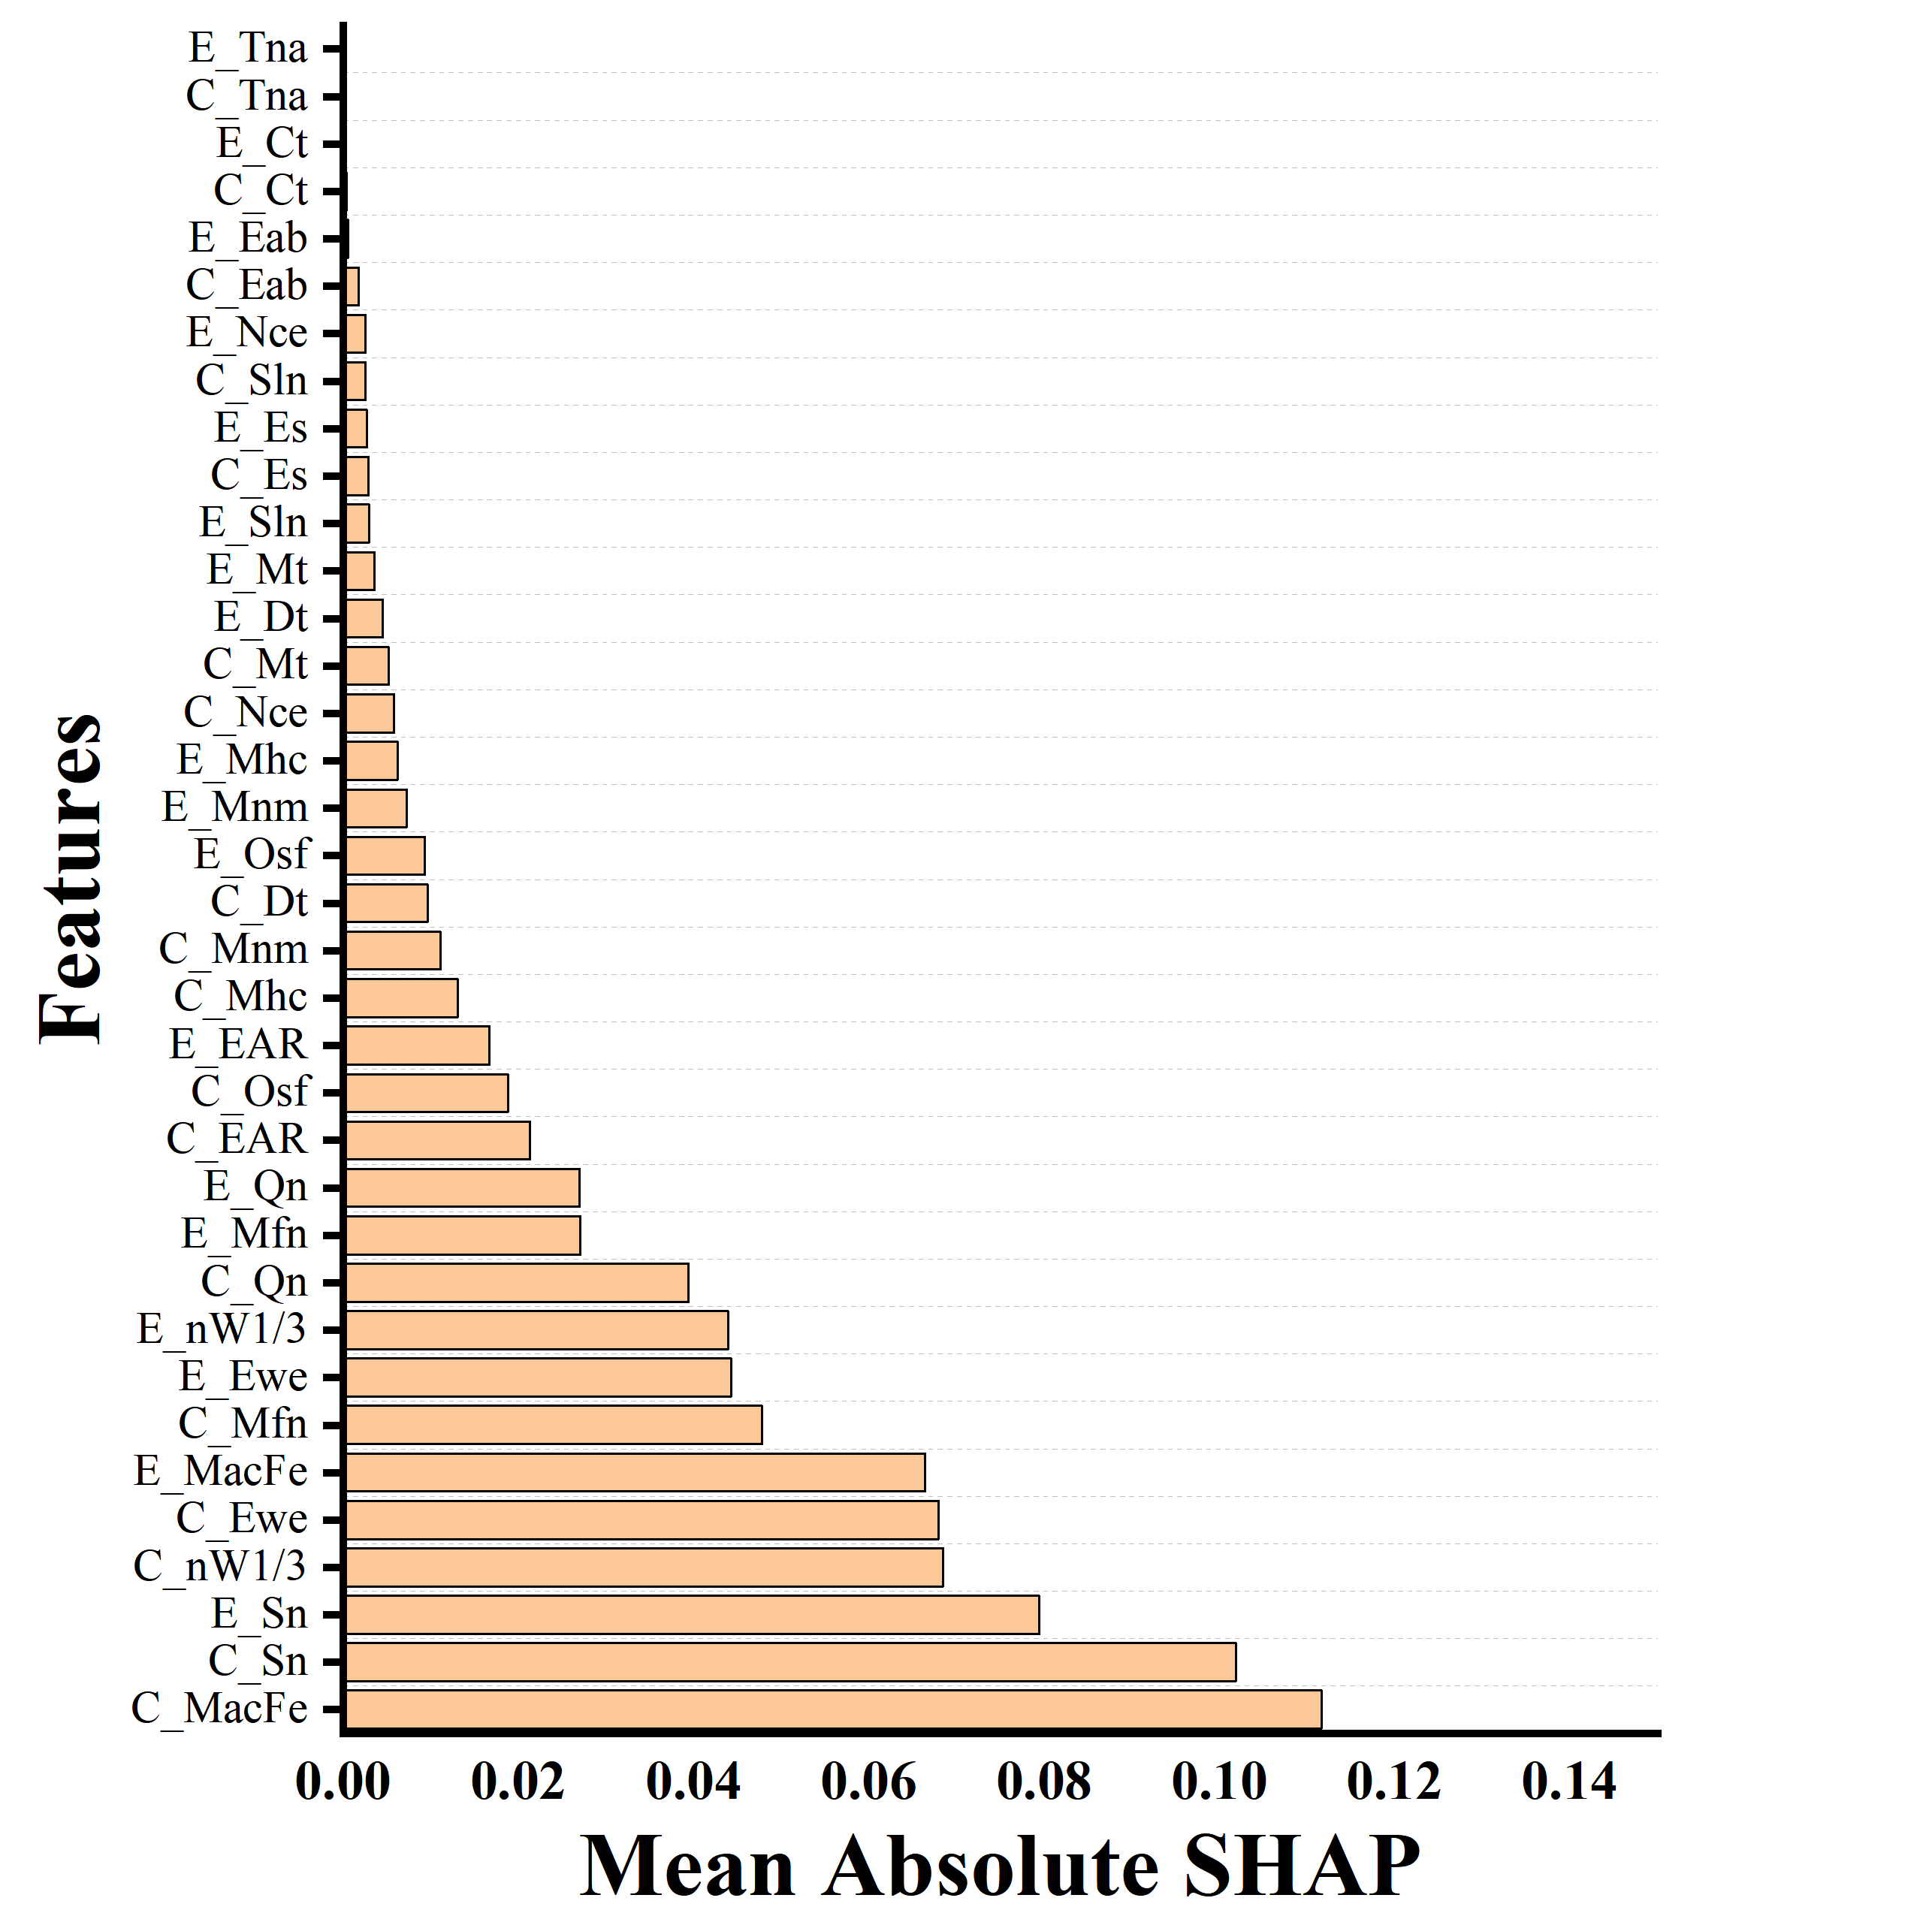 |
| --- |
| **Fig. S13** Feature importance via SHAP analysis of the CES-KNN model. |

| 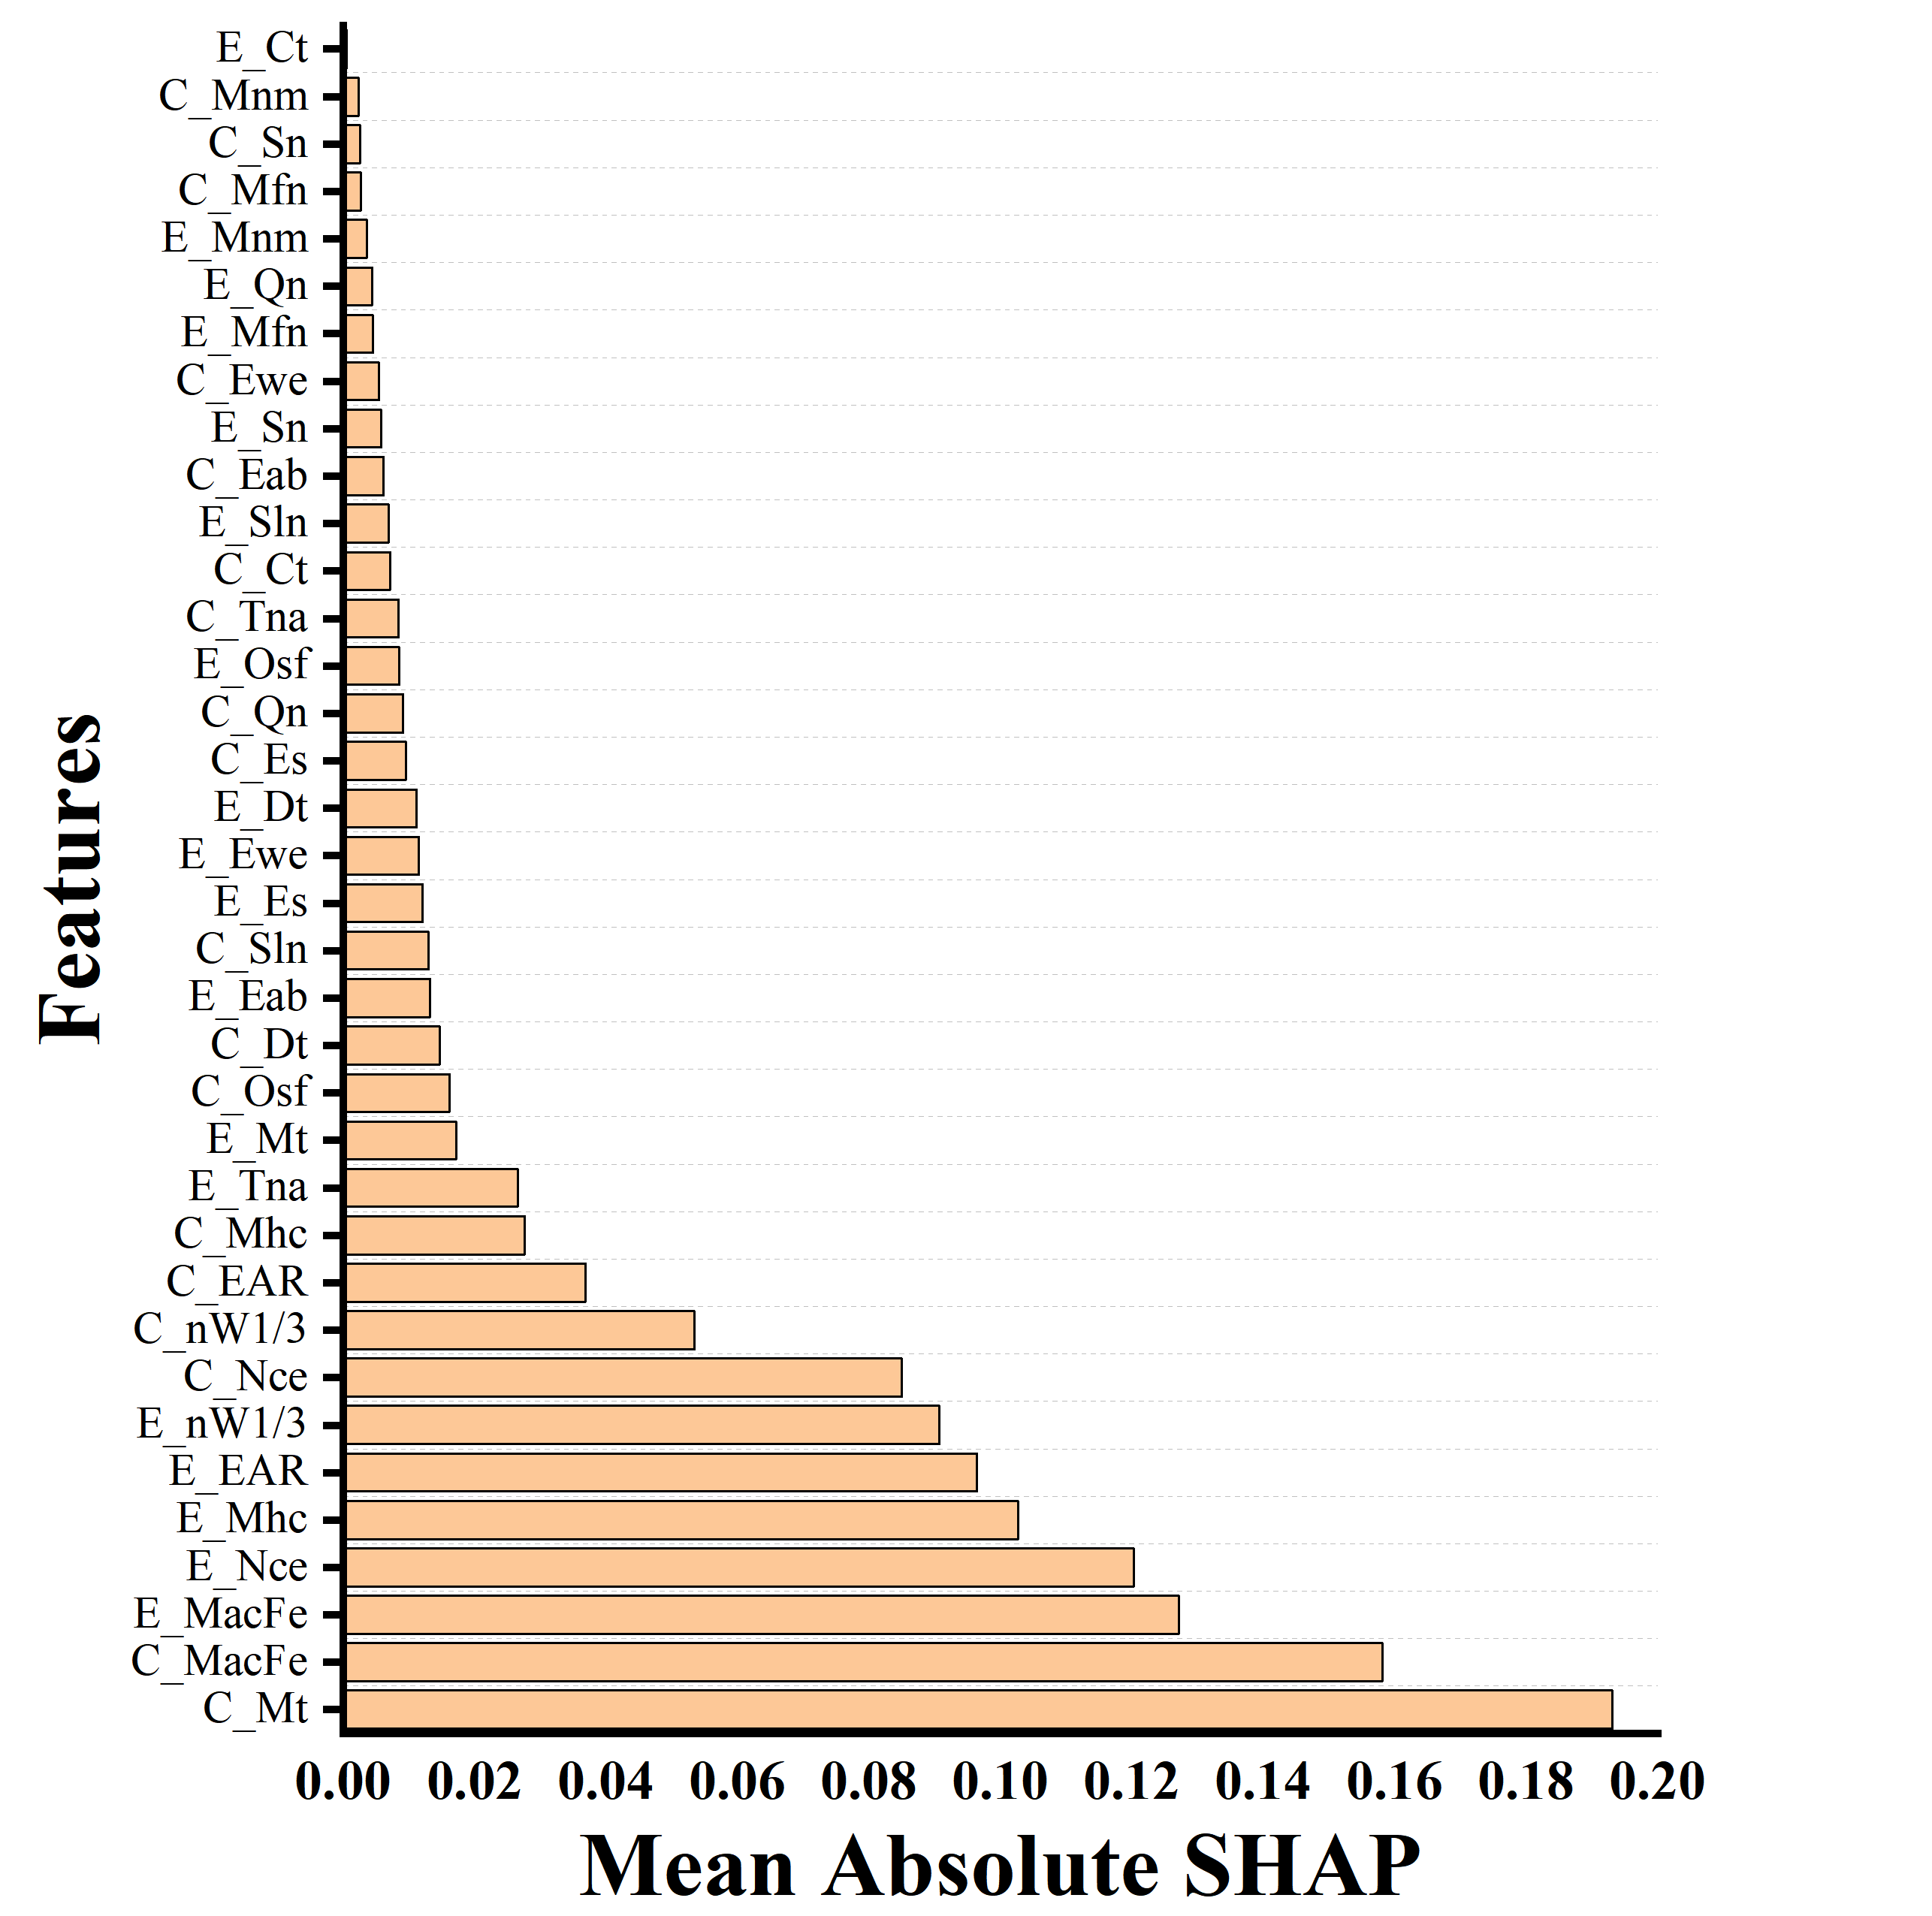 |
| --- |
| **Fig. S14** Feature importance via SHAP analysis of the CES-RF model. |

| 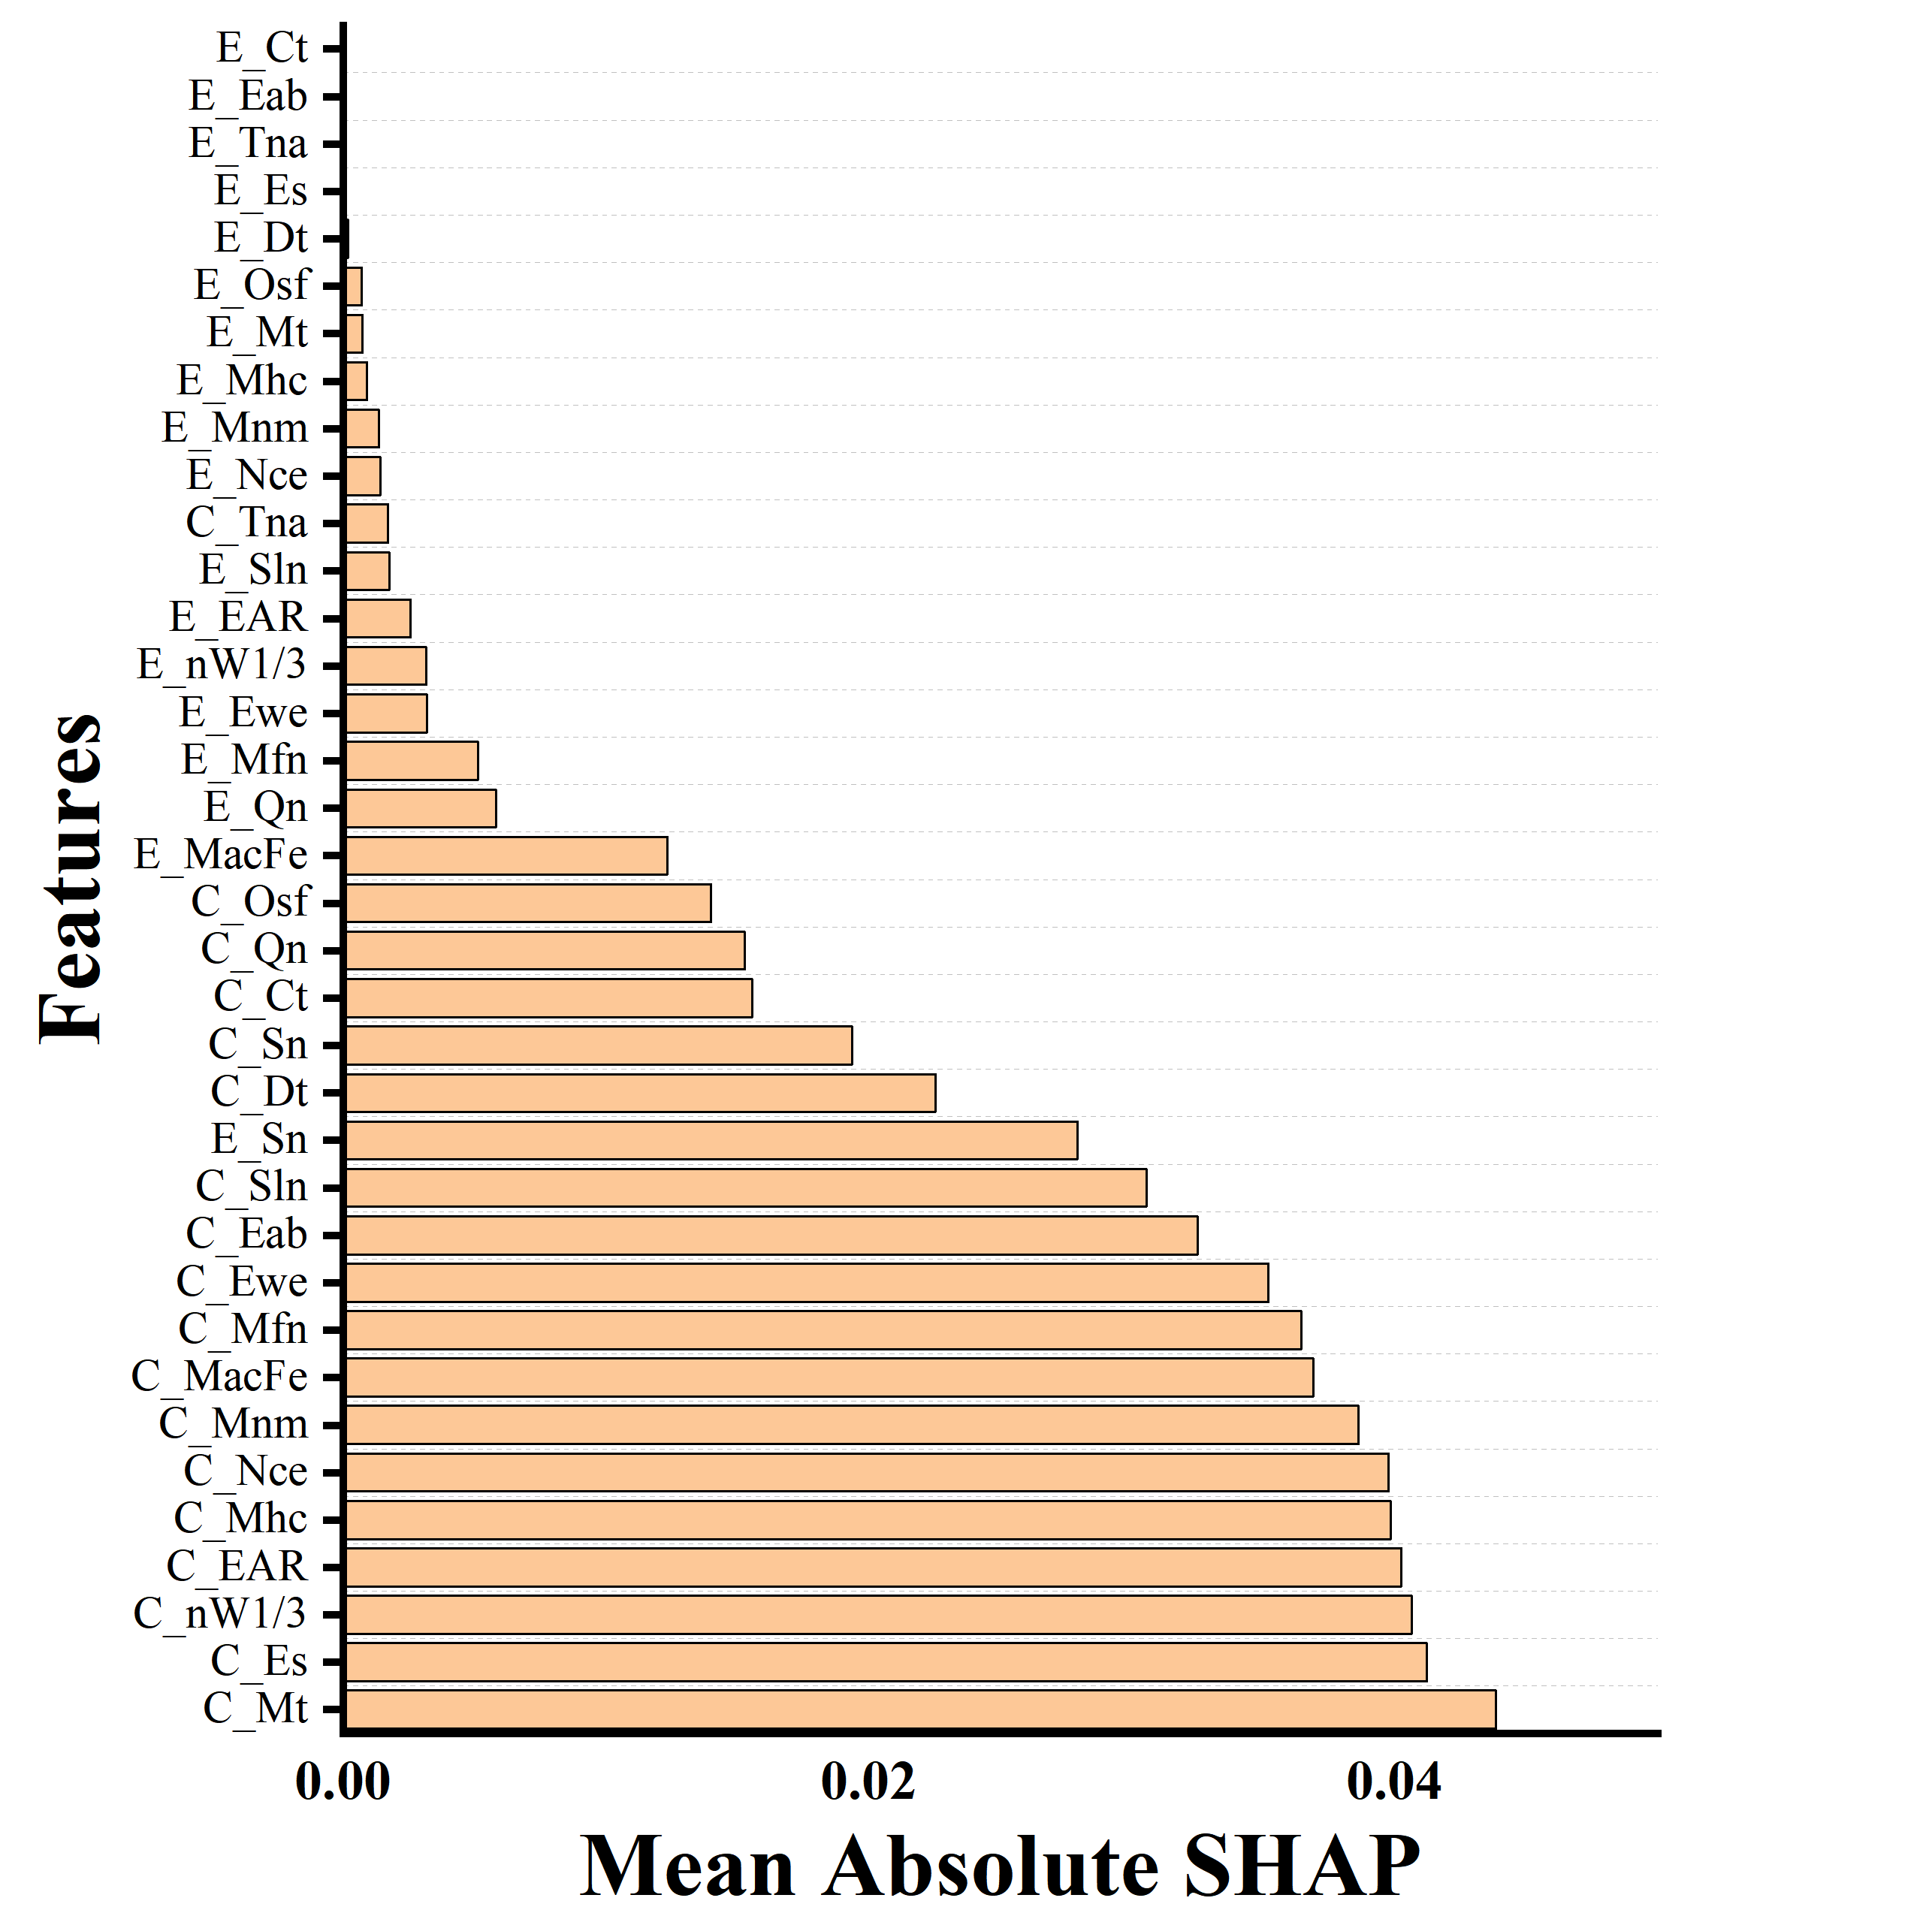 |
| --- |
| **Fig. S15** Feature importance via SHAP analysis of the CES-SVR model. |

| 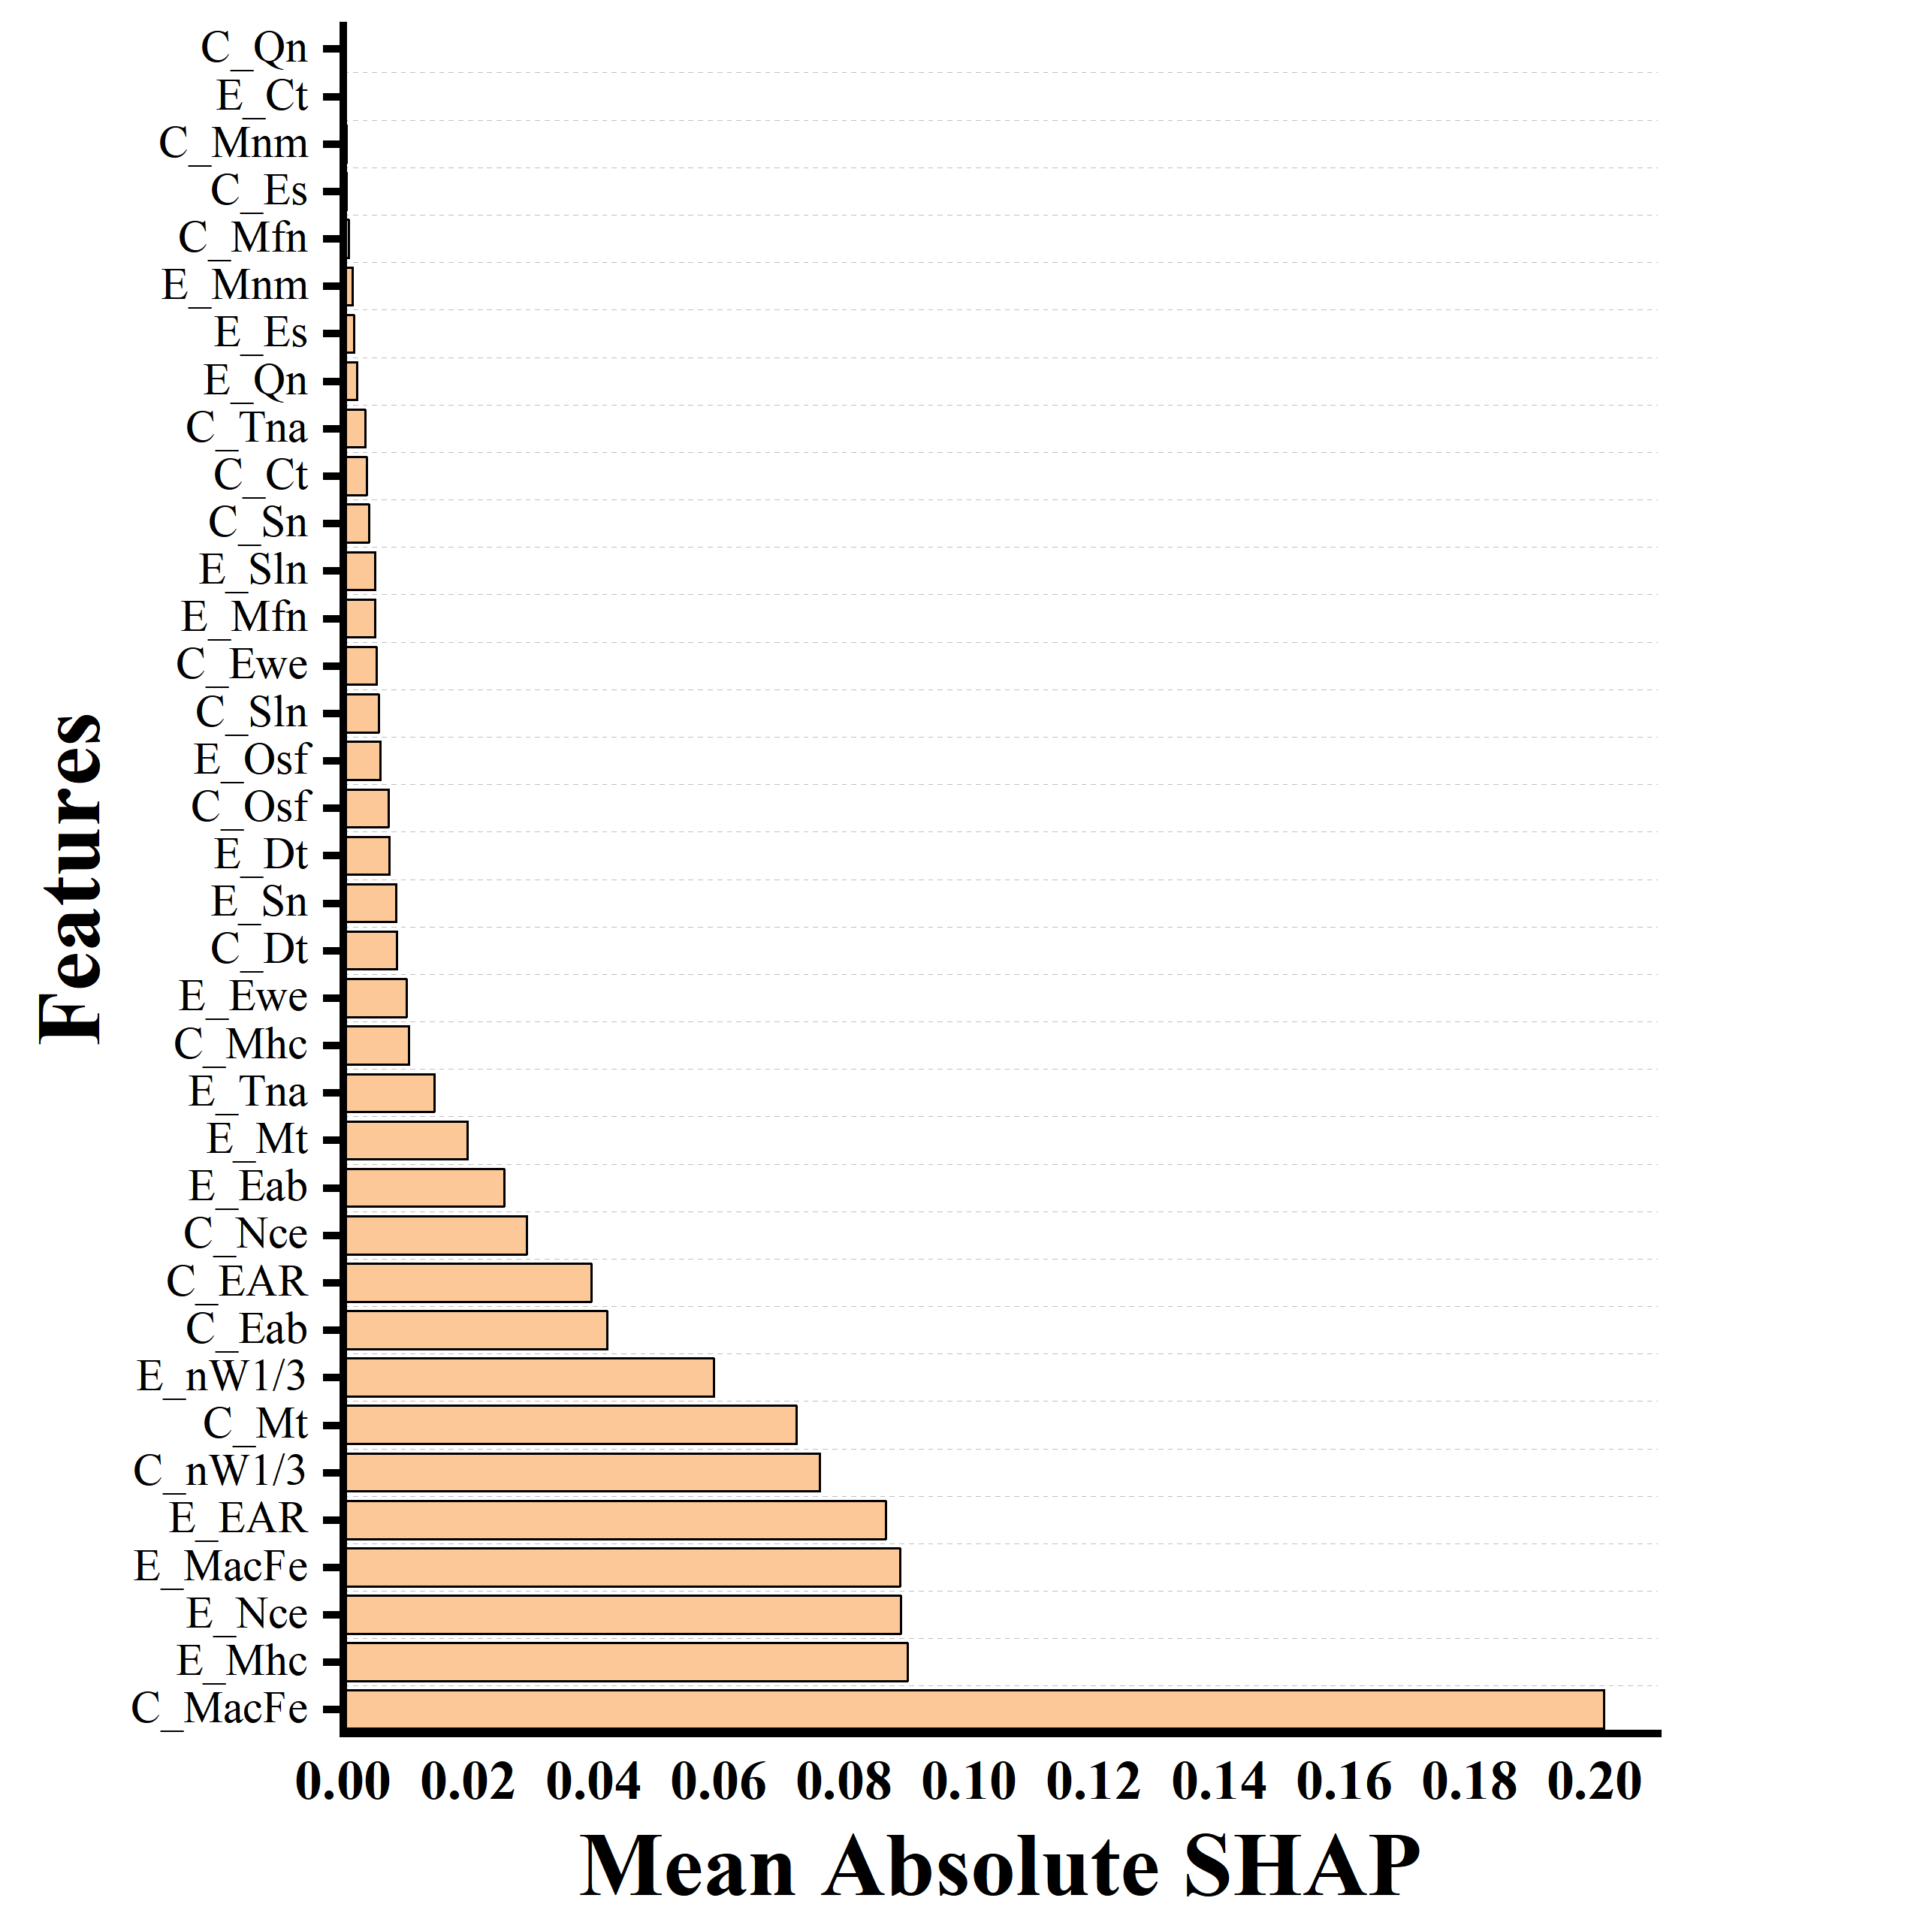 |
| --- |
| **Fig. S16** Feature importance via SHAP analysis of the CES-XGB model. |

| 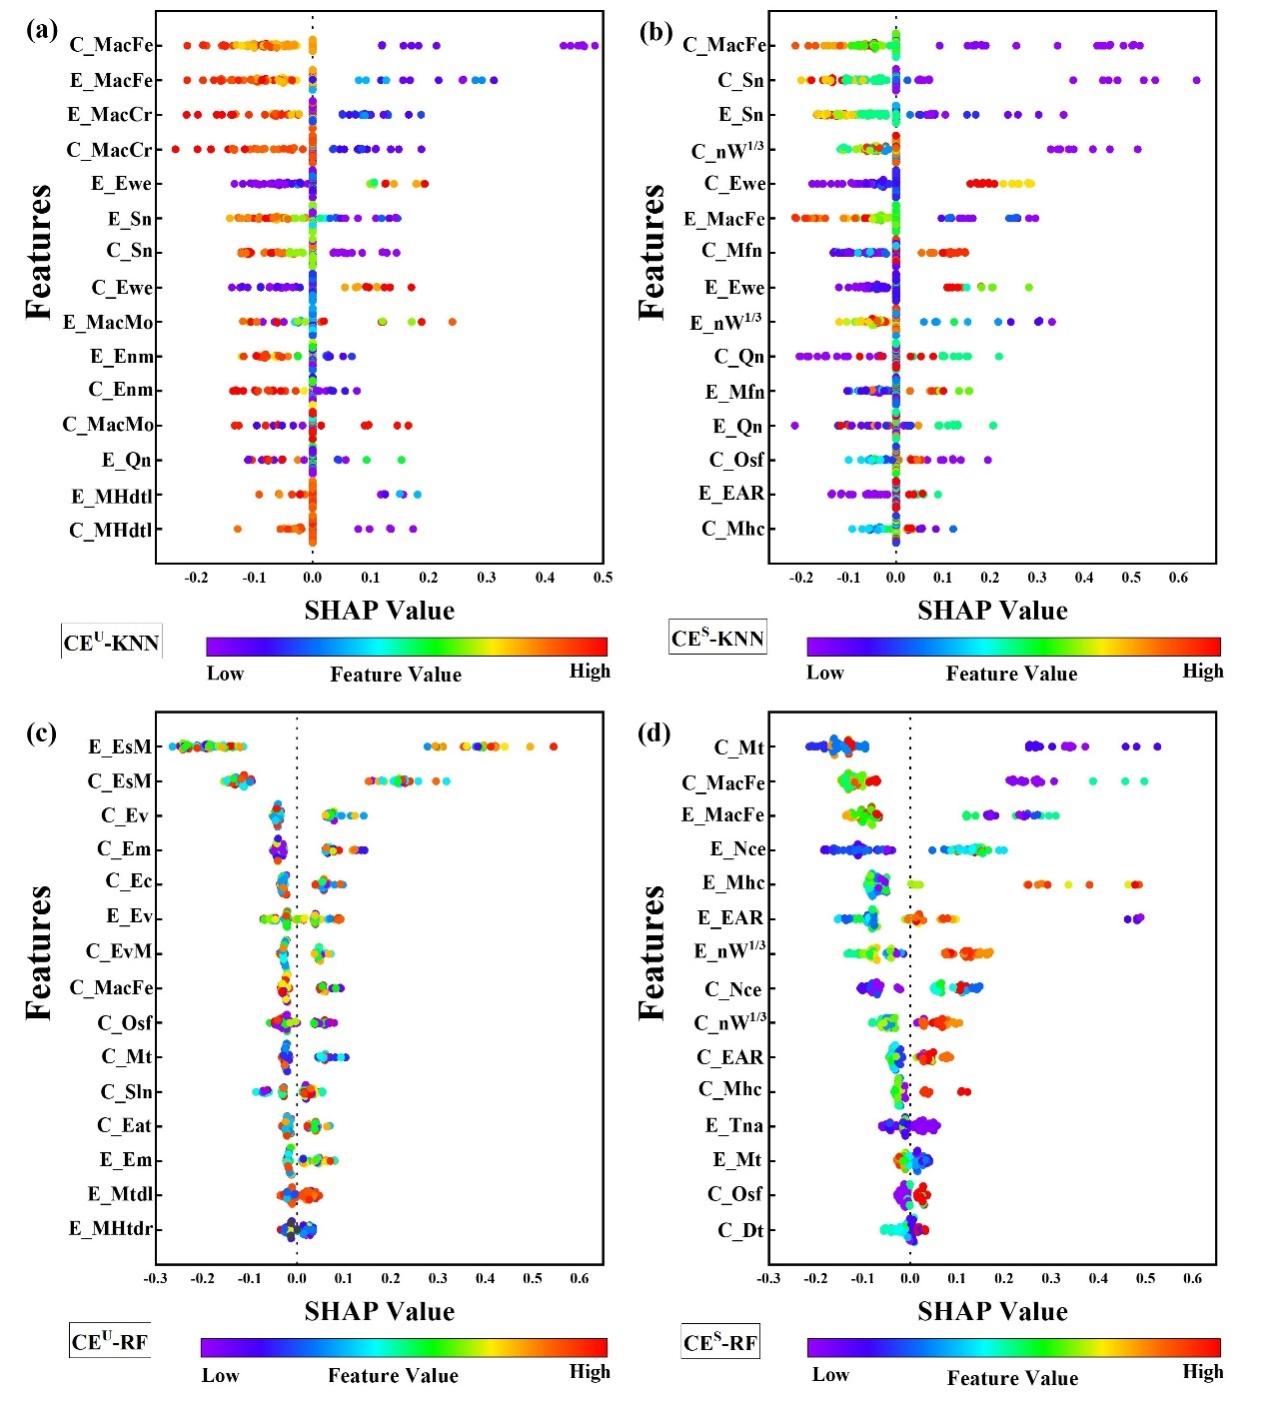 |
| --- |
| **Fig. S17** SHAP analyses of the features of (a) CEU-KNN, (b) CES-KNN, (c) CEU-RF, and (d) CES-RF models. |

| 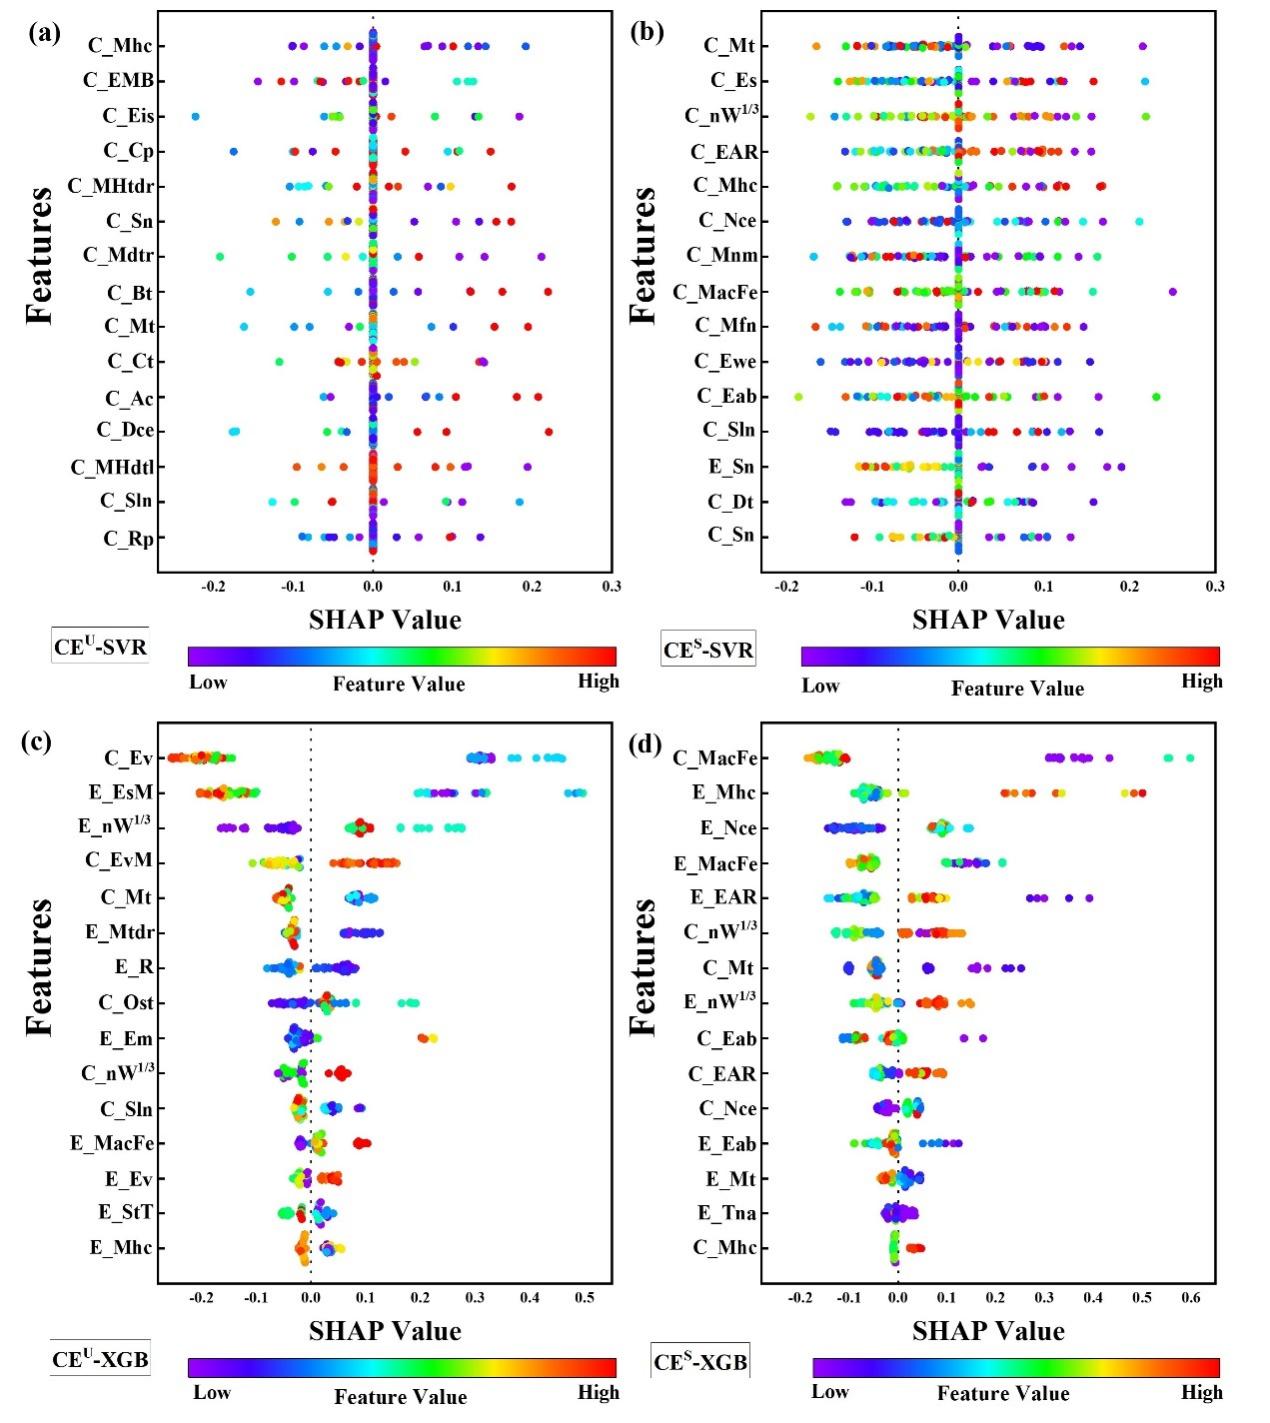 |
| --- |
| **Fig. S18** SHAP analyses of the features of (a) CEU-SVR, (b) CES-SVR, (c) CEU-XGB, and (d) CES-XGB models. |

| 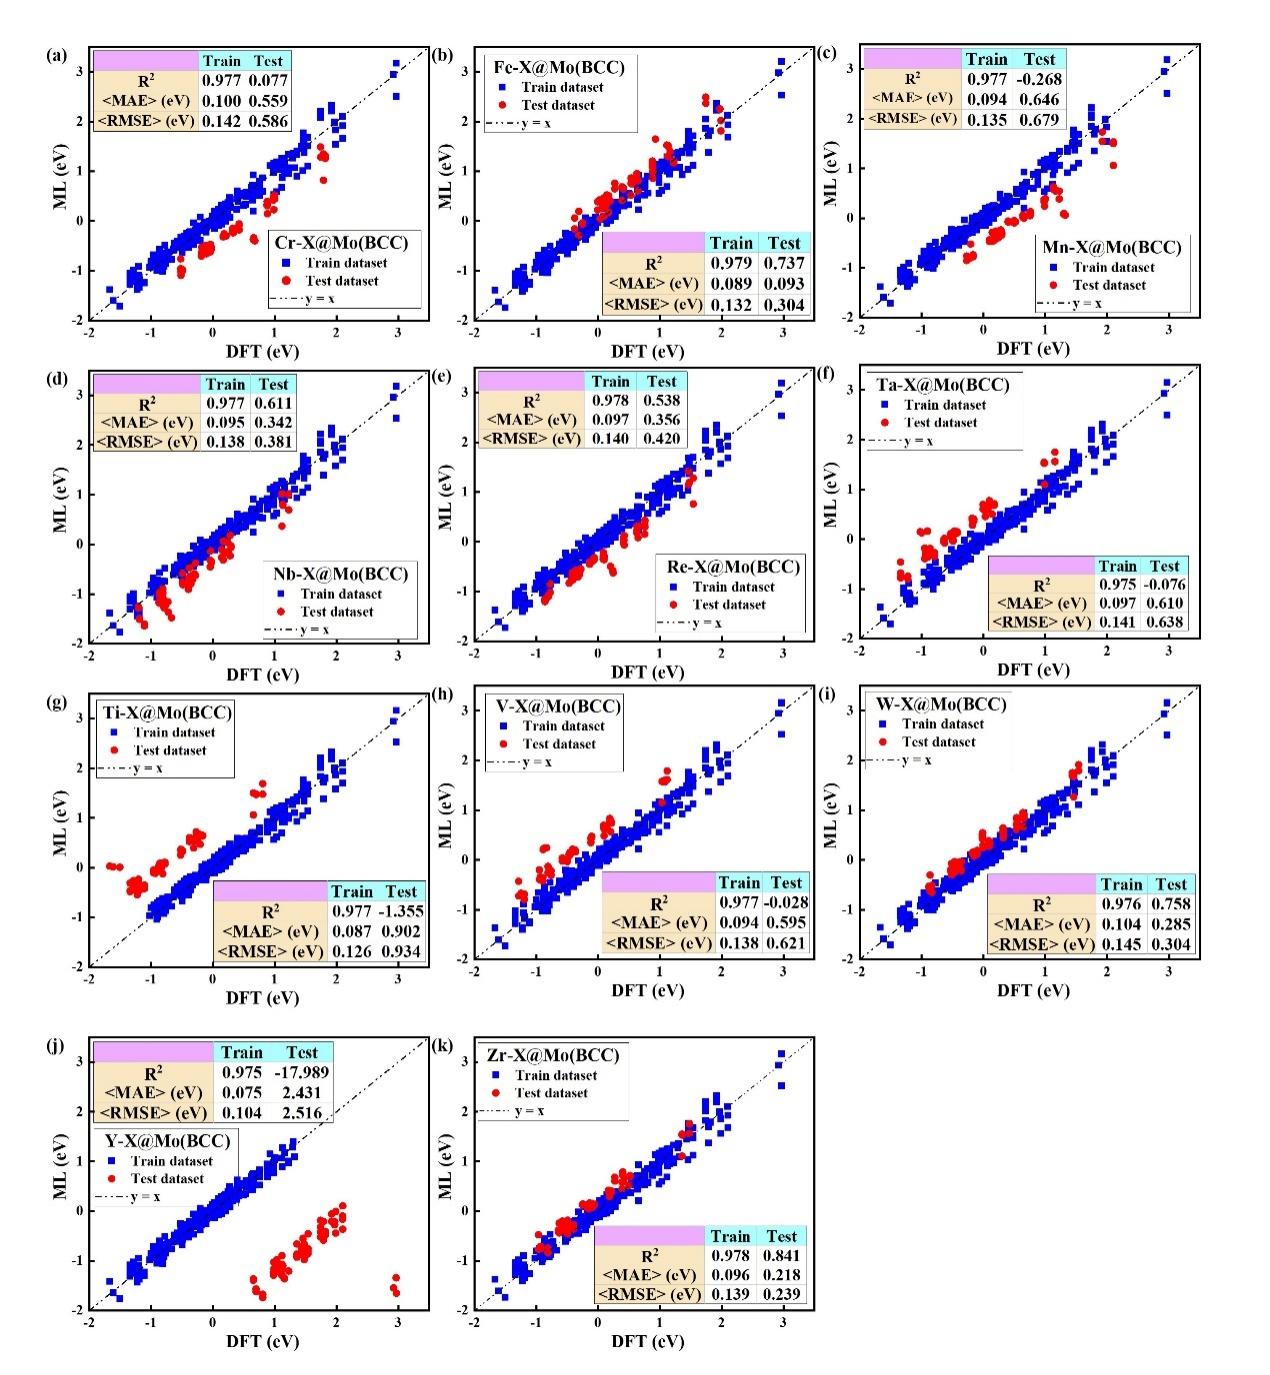 |
| --- |
| **Fig. S19** Performance of the CEU-BRR models for the leave-*p*-out prediction against DFT results on the unseen systems with new elements X= (a) Cr, (b) Fe, (c) Mn, (d) Nb, (e) Re, (f) Ta, (g) Ti, (h) V, (i) W, (j) Y, and (k) Zr, respectively. |

| 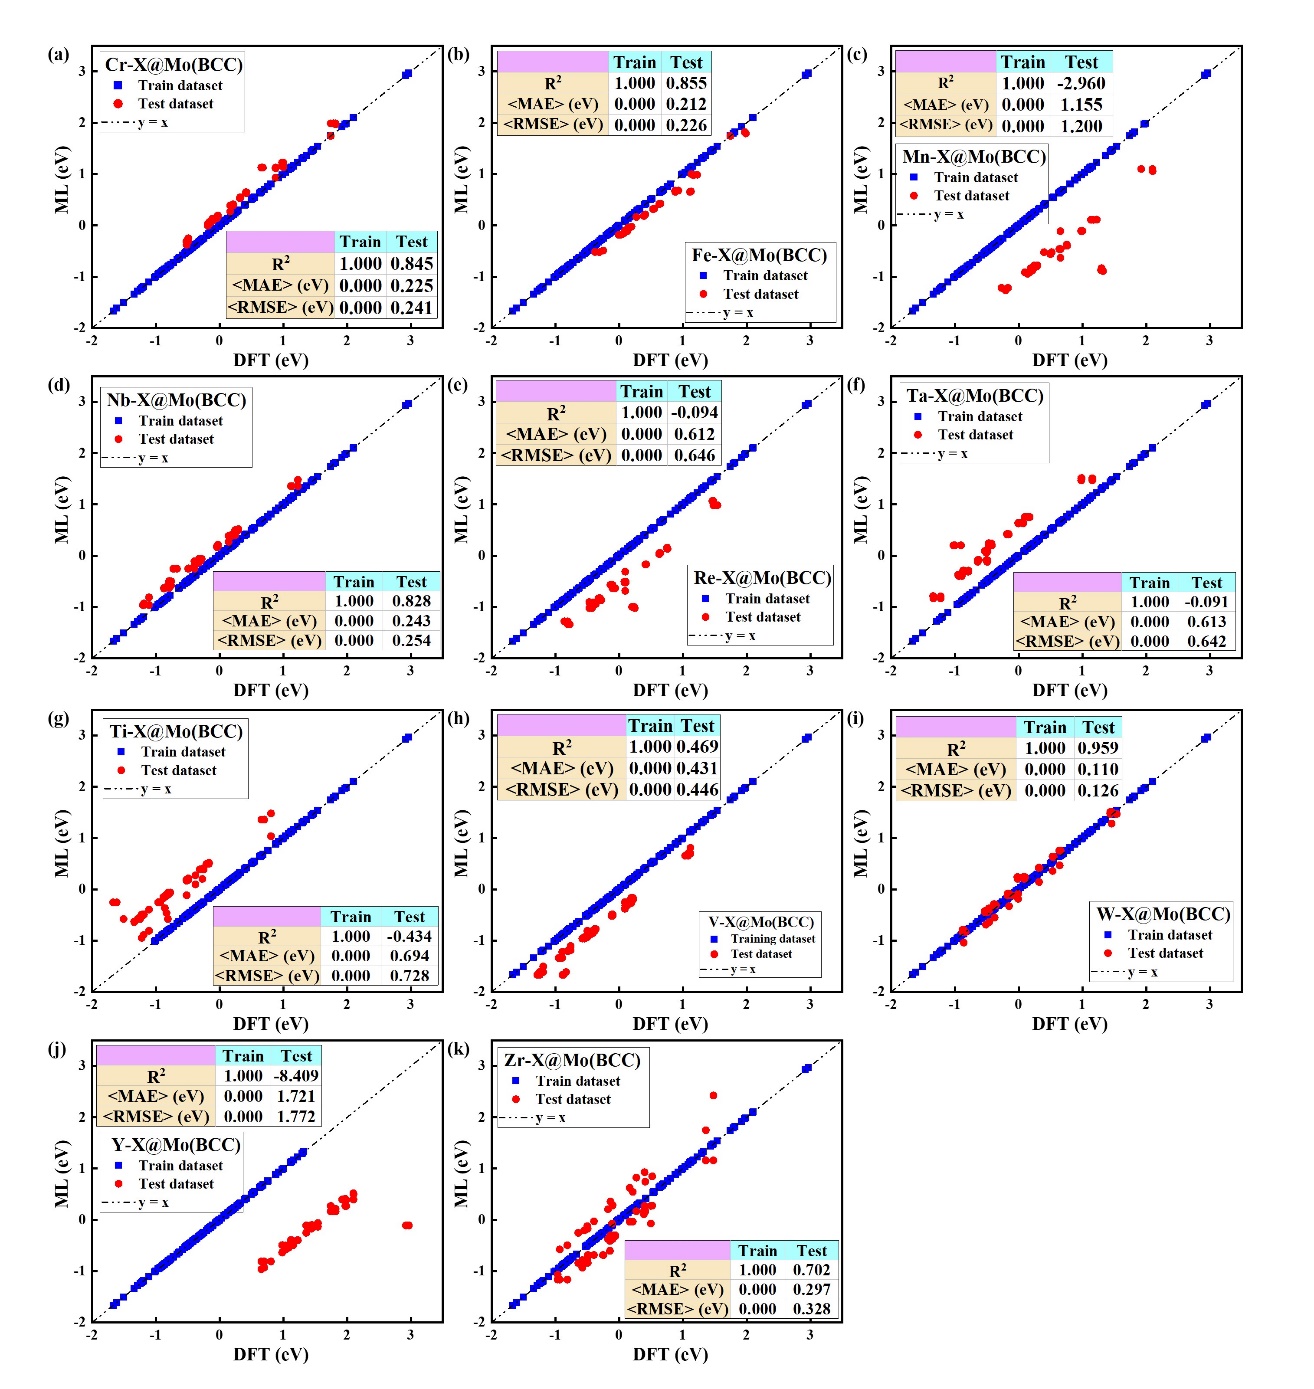 |
| --- |
| **Fig. S20** Performance of the CEU-KNN models for the leave-*p*-out prediction against DFT results on the unseen systems with new elements X= (a) Cr, (b) Fe, (c) Mn, (d) Nb, (e) Re, (f) Ta, (g) Ti, (h) V, (i) W, (j) Y, and (k) Zr, respectively. |

| 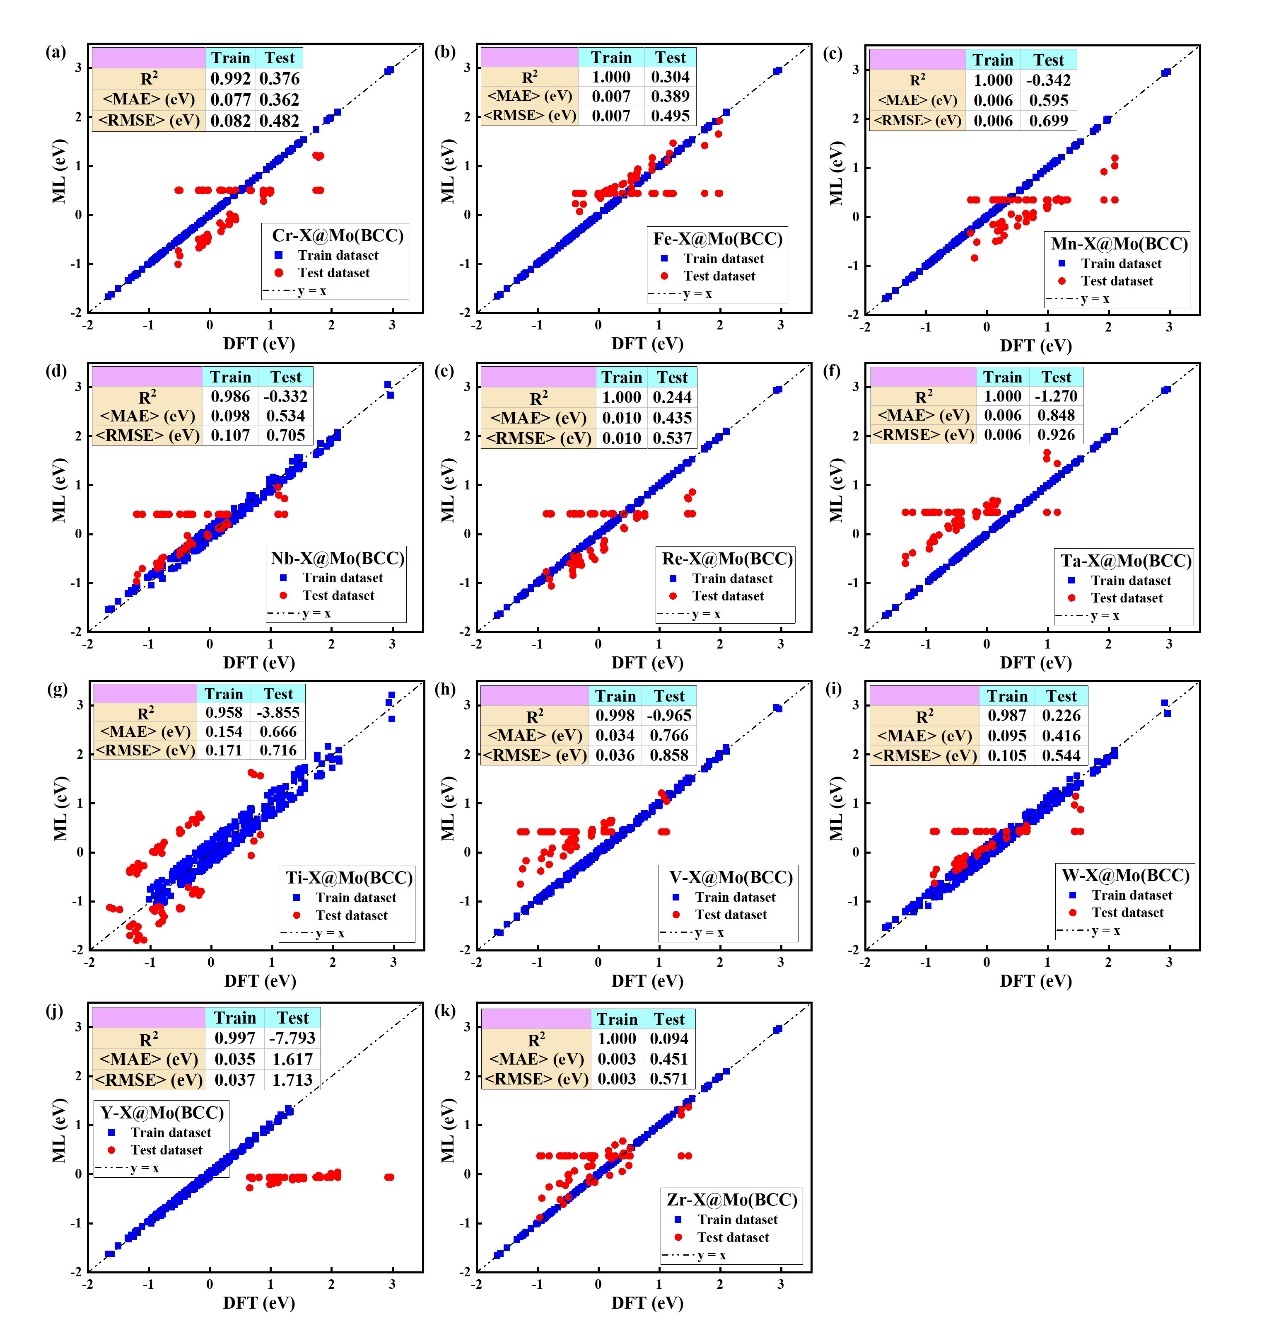 |
| --- |
| **Fig. S21** Performance of the CEU-SVR models for the leave-*p*-out prediction against DFT results on the unseen systems with new elements X= (a) Cr, (b) Fe, (c) Mn, (d) Nb, (e) Re, (f) Ta, (g) Ti, (h) V, (i) W, (j) Y, and (k) Zr, respectively. |

| 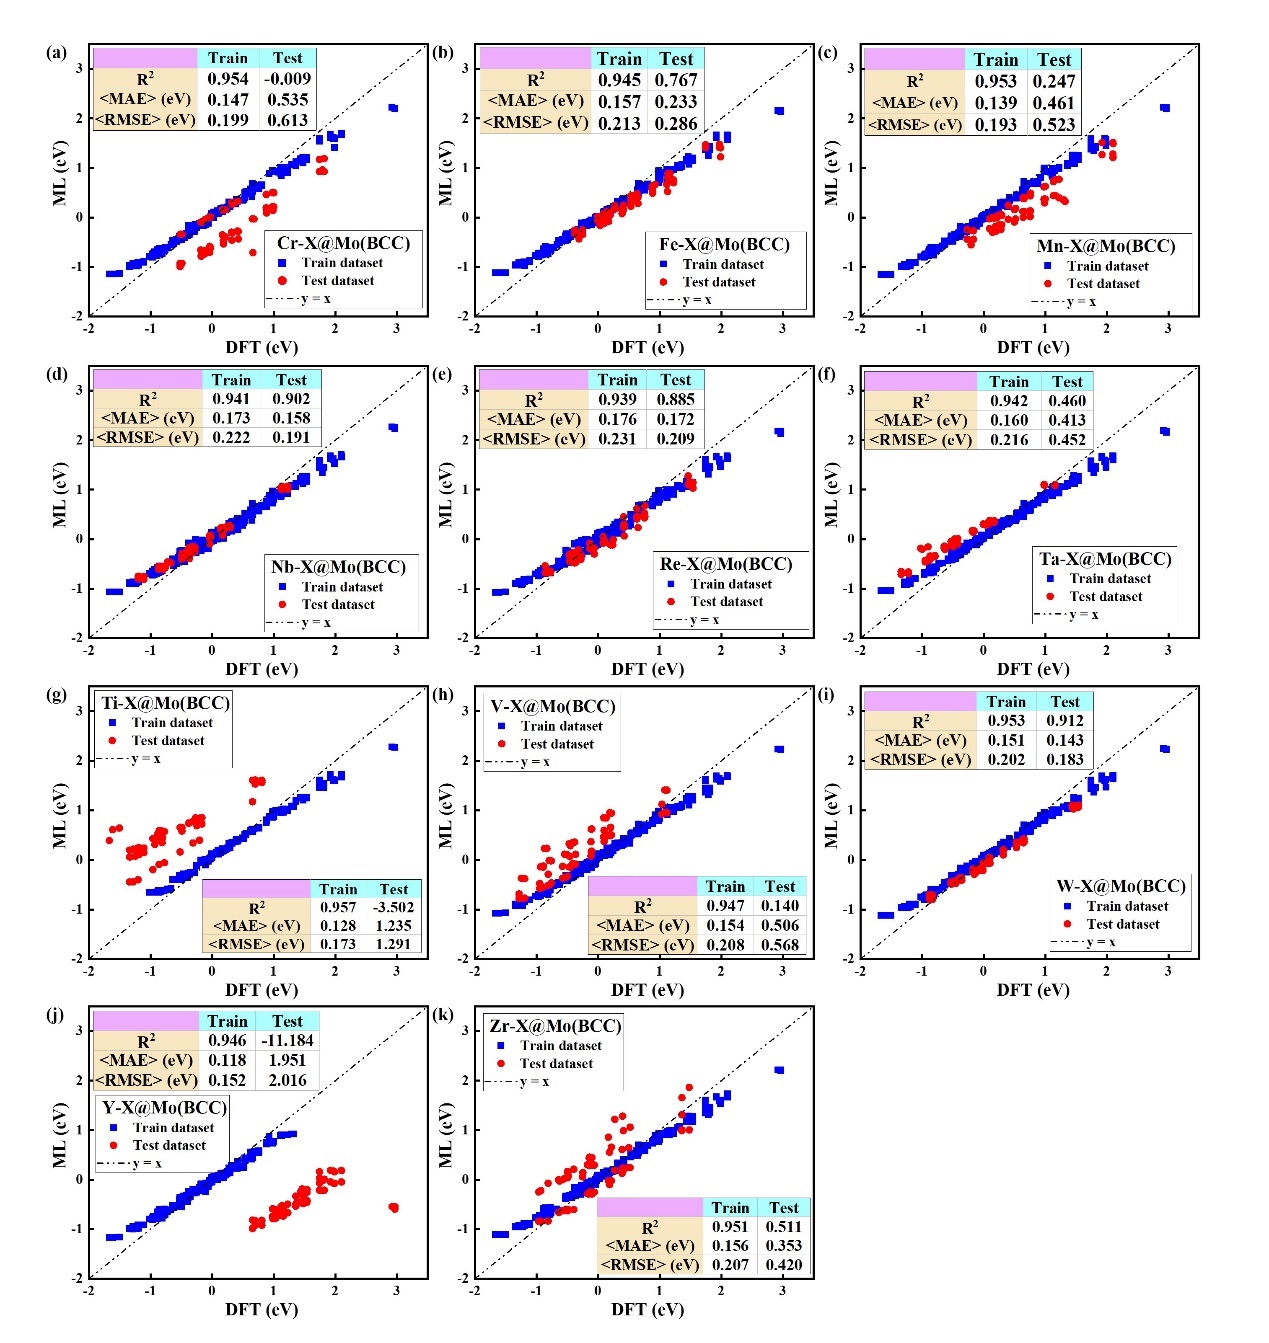 |
| --- |
| **Fig. S22** Performance of the CEU-XGB models for the leave-*p*-out prediction against DFT results on the unseen systems with new elements X= (a) Cr, (b) Fe, (c) Mn, (d) Nb, (e) Re, (f) Ta, (g) Ti, (h) V, (i) W, (j) Y, and (k) Zr, respectively. |

| 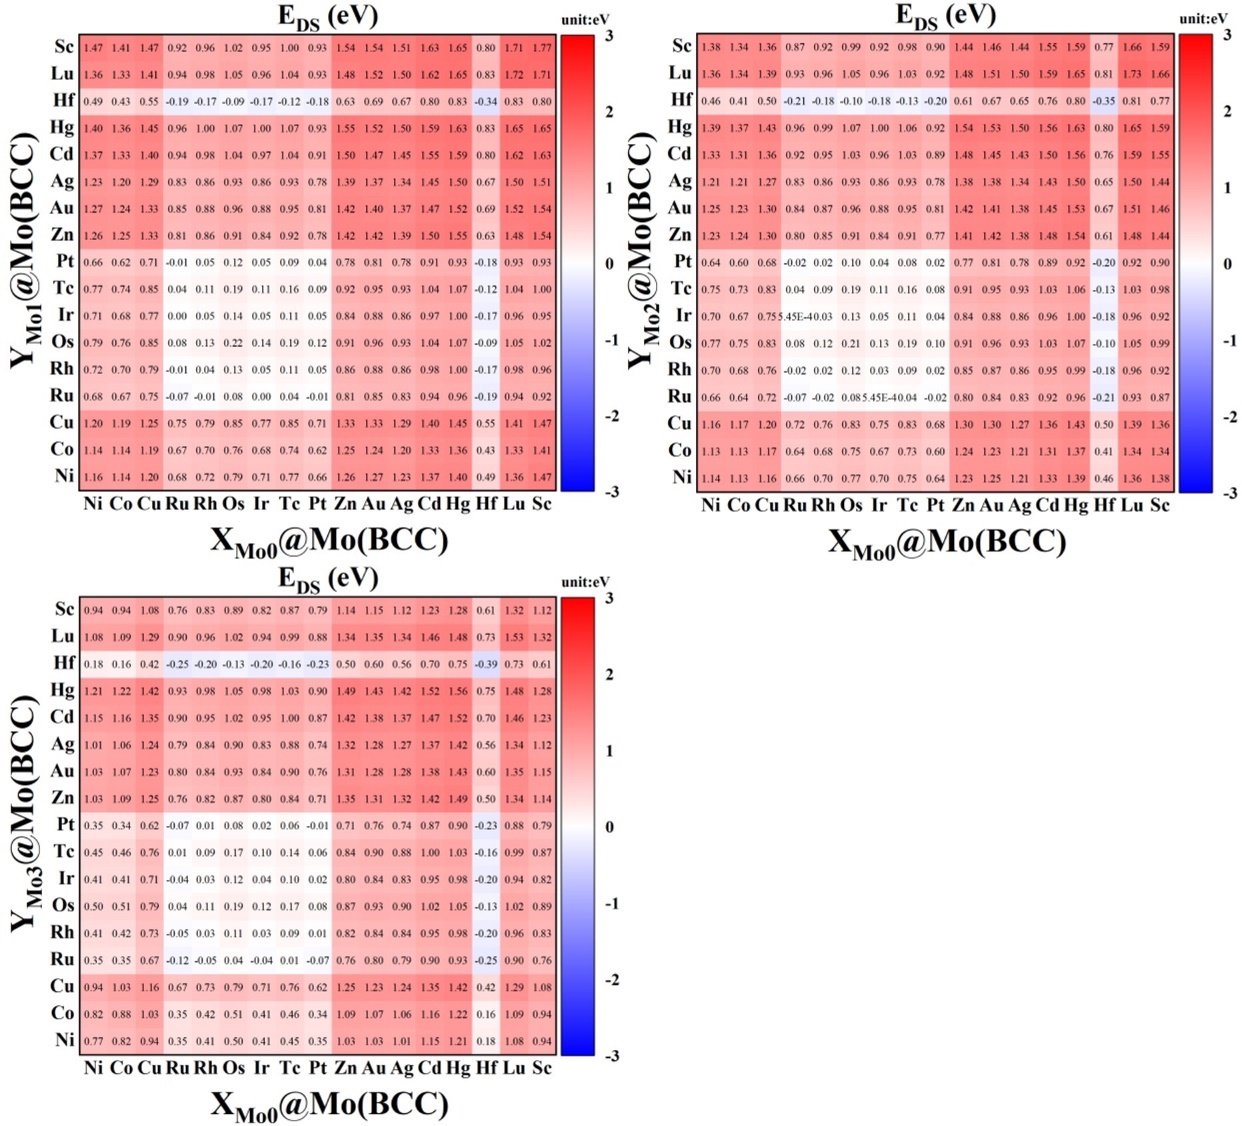 |
| --- |
| **Fig. S23** Double-site substitution energies predicted by the CEU-RF model for the unknown systems with new elements. |

| 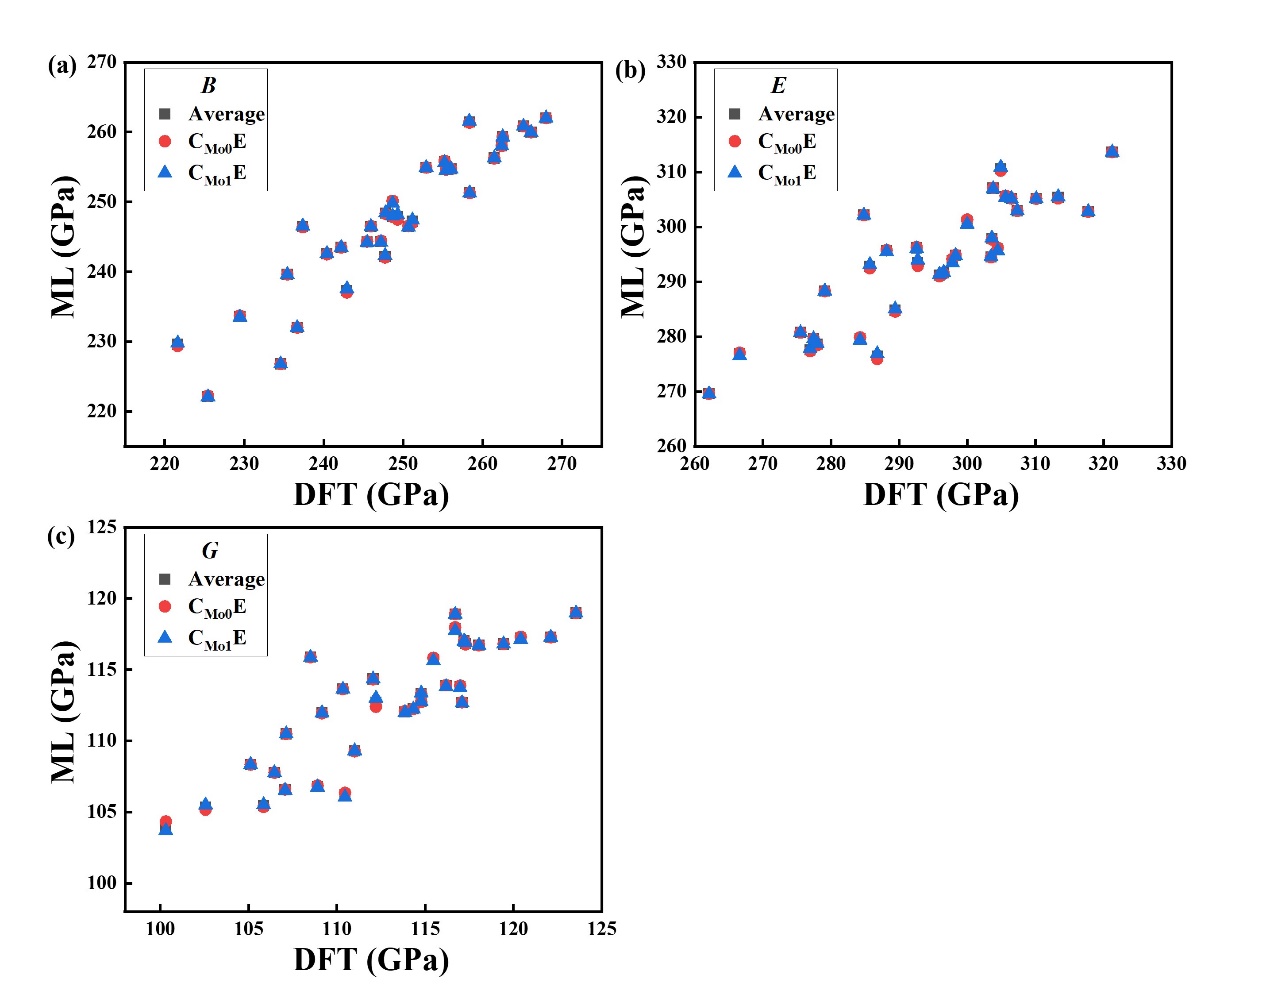 |
| --- |
| **Fig. S24** Mechanical properties of (a) *B*, (b) *E*, and (c) *G* predicted by the dual-CE-feature and single-CE-feature models compared with the DFT results. CMo0E denotes the single-CE-feature model constructed with the Mo0 site as the center; CMo1E denotes the single-CE-feature model constructed with the Mo1 site as the center; Average denotes the dual-CE-feature model with averaged properties. |

**References**

(1) Kresse, G.; Furthmüller, J. Efficient iterative schemes for ab initio total-energy calculations using a plane-wave basis set. *Physical Review B* **1996**, *54* (16), 11169-11186. DOI: <https://doi.org/10.1103/PhysRevB.54.11169>.

(2) Kresse, G.; Furthmüller, J. Efficiency of ab-initio total energy calculations for metals and semiconductors using a plane-wave basis set. *Computational Materials Science* **1996**, *6* (1), 15-50. DOI: <https://doi.org/10.1016/0927-0256(96)00008-0>.

(3) Perdew, J. P.; Burke, K.; Ernzerhof, M. Generalized Gradient Approximation Made Simple. *Physical Review Letters* **1996**, *77* (18), 3865-3868. DOI: <https://doi.org/10.1103/PhysRevLett.77.3865>.

(4) Kresse, G.; Furthmüller, J.; Hafner, J. Theory of the crystal structures of selenium and tellurium: The effect of generalized-gradient corrections to the local-density approximation. *Physical Review B* **1994**, *50* (18), 13181-13185. DOI: <https://doi.org/10.1103/PhysRevB.50.13181>.

(5) Blöchl, P. E. Projector augmented-wave method. *Physical Review B* **1994**, *50* (24), 17953-17979. DOI: <https://doi.org/10.1103/PhysRevB.50.17953>.

(6) Kresse, G.; Joubert, D. From ultrasoft pseudopotentials to the projector augmented-wave method. *Physical Review B* **1999**, *59* (3), 1758-1775. DOI: <https://doi.org/10.1103/PhysRevB.59.1758>.

(7) Born, M.; Huang, K. *Dynamical Theory Of Crystal Lattices*; Oxford University Press, 1996. DOI: <https://doi.org/10.1093/oso/9780192670083.001.0001>.

(8) Voigt, W. *Lehrbuch der Kristallphysik*; Teubner Verlag, Leipzig, 1928.

(9) Reuss, A. Calculation of the Flow Limits of Mixed Crystals on the Basis of the Plasticity of Monocrystals. *Zeitschrift fur Angewandte Mathematik und Mechanik* **1929**, *9*, 49-58. DOI: <https://doi.org/10.1002/zamm.19290090104>.

(10) Hill, R. The Elastic Behaviour of a Crystalline Aggregate. *Proceedings of the Physical Society. Section A* **1952**, *65* (5), 349. DOI: <https://doi.org/10.1088/0370-1298/65/5/307>.
